# Supplementary material for: Exposure to persistent organic pollutants and thyroid cancer risk: a study protocol of systematic review and meta-analysis
Source: PubMed Central journal article supplement — BMJ Open. 2021 Aug 18;11(8):e048451. doi: 10.1136/bmjopen-2020-048451 (PMC8375755; doi:10.1136/bmjopen-2020-048451), 2021-08-18
Supplement: bmjopen-2020-048451.draft_revisions.pdf [file bmjopen-2020-048451.draft_revisions.pdf]

# BMJ Open

BMJ Open is committed to open peer review. As part of this commitment we make the peer review history of every article we publish publicly available.

When an article is published we post the peer reviewers' comments and the authors' responses online. We also post the versions of the paper that were used during peer review. These are the versions that the peer review comments apply to.

The versions of the paper that follow are the versions that were submitted during the peer review process. They are not the versions of record or the final published versions. They should not be cited or distributed as the published version of this manuscript.

BMJ Open is an open access journal and the full, final, typeset and author-corrected version of record of the manuscript is available on our site with no access controls, subscription charges or pay-per-view fees (<http://bmjopen.bmj.com>).

If you have any questions on BMJ Open's open peer review process please email [info.bmjopen@bmj.com](mailto:info.bmjopen@bmj.com)

# BMJ Open

## Exposure to persistent organic pollutants and thyroid cancer risk: a study protocol of systematic review and meta-analysis

|                               |                                                                                                                                                                                                                                                                                                                                                                                                                                                                                                                                                      |
|-------------------------------|------------------------------------------------------------------------------------------------------------------------------------------------------------------------------------------------------------------------------------------------------------------------------------------------------------------------------------------------------------------------------------------------------------------------------------------------------------------------------------------------------------------------------------------------------|
| Journal:                      | <i>BMJ Open</i>                                                                                                                                                                                                                                                                                                                                                                                                                                                                                                                                      |
| Manuscript ID                 | bmjopen-2020-048451                                                                                                                                                                                                                                                                                                                                                                                                                                                                                                                                  |
| Article Type:                 | Protocol                                                                                                                                                                                                                                                                                                                                                                                                                                                                                                                                             |
| Date Submitted by the Author: | 26-Dec-2020                                                                                                                                                                                                                                                                                                                                                                                                                                                                                                                                          |
| Complete List of Authors:     | Zhang, Yuxue; Harbin Medical University, Department of Hygiene Microbiology<br>Liu, YuPeng; Wenzhou Medical University, Department of Epidemiology and Biostatistics<br>Miao, SuSheng; Harbin Medical University Cancer Hospital, Department of Head and Neck Surgery<br>Liu, XiaoDong; Wenzhou Medical University, Department of Occupational and Environmental Health<br>Ma, ShuMei; Wenzhou Medical University, Department of Occupational and Environmental Health<br>Qu, ZhangYi; Harbin Medical University, Department of Hygiene Microbiology |
| Keywords:                     | PUBLIC HEALTH, Thyroid disease < DIABETES & ENDOCRINOLOGY, Endocrine tumours < ONCOLOGY, Epidemiology < ONCOLOGY                                                                                                                                                                                                                                                                                                                                                                                                                                     |
|                               |                                                                                                                                                                                                                                                                                                                                                                                                                                                                                                                                                      |

SCHOLARONE™  
Manuscripts

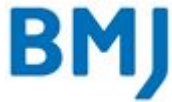

I, the Submitting Author has the right to grant and does grant on behalf of all authors of the Work (as defined in the below author licence), an exclusive licence and/or a non-exclusive licence for contributions from authors who are: i) UK Crown employees; ii) where BMJ has agreed a CC-BY licence shall apply, and/or iii) in accordance with the terms applicable for US Federal Government officers or employees acting as part of their official duties; on a worldwide, perpetual, irrevocable, royalty-free basis to BMJ Publishing Group Ltd ("BMJ") its licensees and where the relevant Journal is co-owned by BMJ to the co-owners of the Journal, to publish the Work in this journal and any other BMJ products and to exploit all rights, as set out in our [licence](#).

The Submitting Author accepts and understands that any supply made under these terms is made by BMJ to the Submitting Author unless you are acting as an employee on behalf of your employer or a postgraduate student of an affiliated institution which is paying any applicable article publishing charge ("APC") for Open Access articles. Where the Submitting Author wishes to make the Work available on an Open Access basis (and intends to pay the relevant APC), the terms of reuse of such Open Access shall be governed by a Creative Commons licence – details of these licences and which [Creative Commons](#) licence will apply to this Work are set out in our licence referred to above.

Other than as permitted in any relevant BMJ Author's Self Archiving Policies, I confirm this Work has not been accepted for publication elsewhere, is not being considered for publication elsewhere and does not duplicate material already published. I confirm all authors consent to publication of this Work and authorise the granting of this licence.

Title page:

**Exposure to persistent organic pollutants and thyroid cancer risk: a study protocol of systematic review and meta-analysis**

YuXue Zhang<sup>1#</sup>, YuPeng Liu<sup>2#</sup>, SuSheng Miao<sup>3</sup>, XiaoDong Liu<sup>4</sup>, ShuMei Ma<sup>4\*</sup>, ZhangYi Qu<sup>1\*</sup>

**Affiliations:**

**YuXue Zhang**, MSc. and **ZhangYi Qu**, Ph.D., <sup>1</sup>Department of Hygiene Microbiology, School of Public Health, Harbin Medical University, 157 Baojian Road, Harbin 150081, Heilongjiang Province, China; **YuPeng Liu**, MD., <sup>2</sup>Department of Epidemiology and Biostatistics, School of Public Health and Management, Wenzhou Medical University, 112 Nanliu Road, ChaShan High Education Zone, Wenzhou 325000, Zhejiang Province, China; **SuSheng Miao**, M.D. and Deputy Chief Surgeon, <sup>3</sup>Department of Head and Neck Surgery, Harbin Medical University Cancer Hospital, 150 Haping Road, Harbin 150081, Heilongjiang Province, China; **XiaoDong Liu**, MD. and **ShuMei Ma**, M.D., <sup>4</sup>Department of Occupational and Environmental Health, School of Public Health and Management, Wenzhou Medical University, 112 Nanliu Road, ChaShan High Education Zone, Wenzhou 325000, Zhejiang Province, China.

**Correspondence to:**

Professor **ZhangYi Qu**, Ph.D., Department of Hygiene Microbiology, School of Public Health, Harbin Medical University, 157 Baojian Road, Harbin 150081, Heilongjiang Province, China. Tel: +86-(0)451-87502881; Fax: +86-(0)451-87502885; E-mail: [quzy\\_hmu@163.com](mailto:quzy_hmu@163.com).

Professor **ShuMei Ma**, M.D., Department of Occupational and Environmental Health, School of Public Health and Management, Wenzhou Medical University, 112 Nanliu Road, ChaShan High Education Zone, Wenzhou 325000, Zhejiang Province, China. Tel/Fax: +86-(0)577-86699182; E-mail: [shmm2001@126.com](mailto:shmm2001@126.com).

#These two authors contributed equally to this work.

**Author e-mail:** YuXue Zhang, [zhang\\_yuxue@126.com](mailto:zhang_yuxue@126.com); YuPeng Liu, [liuyupeng@wmu.edu.cn](mailto:liuyupeng@wmu.edu.cn); SuSheng Miao, [drmiaosusheng@126.com](mailto:drmiaosusheng@126.com); XiaoDong Liu, [liuxd2014@126.com](mailto:liuxd2014@126.com); ShuMei Ma, [shmm2001@126.com](mailto:shmm2001@126.com); ZhangYi Qu, [quzy\\_hmu@163.com](mailto:quzy_hmu@163.com).

### Strengths and limitations of this study

- This will be the most comprehensive and up-to-date systematic review to synthesise the evidence on the health effects of exposure to any types of persistent organic pollutants on the incidence risk of thyroid cancer.
- We will use rigorous statistical methods to summarise all the currently eligible data from epidemiological studies, perform extensive sensitivity meta-analyses to evaluate the robustness of our findings.
- The main possible limitations of this study are a limited number of eligible studies and possibly significant heterogeneity between studies.
- Another potential limitation is that it may be difficult to evaluate publication bias if there are not sufficient studies included.

1  
2  
3  
4  
5  
6  
7  
8  
9  
10  
11  
12  
13  
14  
15  
16  
17  
18  
19  
20  
21  
22  
23  
24  
25  
26  
27  
28  
29  
30  
31  
32  
33  
34  
35  
36  
37  
38  
39  
40  
41  
42  
43  
44  
45  
46  
47  
48  
49  
50  
51  
52  
53  
54  
55  
56  
57  
58  
59  
60

1 **ABSTRACT:**

2 **Introduction:** The thyroid cancer incidence has been increasing all over the world. However, the  
3 aetiology of thyroid cancer remains unclear. A growing body of evidence suggested exposure to  
4 persistent organic pollutants (POPs) may play a role in the initiation of thyroid cancer, but the results  
5 are generally inconsistent across studies. This review aims to synthesise the evidence for the health  
6 effects of POPs on the risk of thyroid cancer.

7 **Methods and analysis:** This protocol was reported in accordance to the Preferred Reporting Items for  
8 Systematic Review and Meta-Analysis Protocols (PRISMA-P) statements. A comprehensive search,  
9 including electronic database search (e.g. PubMed, Embase, ProQuest, and CNKI), website search,  
10 and manual search, will be performed to identify all eligible studies. The Population, Exposure,  
11 Comparator and Outcome (PECO) framework was used to clarify the inclusion and exclusion criteria.  
12 The Newcastle-Ottawa Scale (NOS) will be used to assess the quality of included studies. Maximally  
13 adjusted effect estimates from individual studies will be summarized with random-effect models in a  
14 conservative manner.  $I^2$  statistics and Q-tests will be used to test the heterogeneity across studies. We  
15 will perform extensive sensitivity analyses, such as confounding RR, E-value, fixed-effect models,  
16 excluding the most relatively weighted study, including only the high-quality studies, and many  
17 predesigned subgroup analyses, etc. The findings will be reported in accordance to the PRISMA  
18 guidelines.

19 **Ethics and dissemination:** Ethical approval is not required in this systematic review of published  
20 literatures. The results will be published in a peer-reviewed journal and presented at relevant  
21 conferences.

22 **PROSPERO registration number:** CRD42020181343

## 1. INTRODUCTION

In the last decades, thyroid cancer was the most rapidly increasing cancer worldwide.<sup>1 2</sup> In 2020, there were 448,915 new cases in women worldwide, representing the fifth-most common cancer in women, compared with 137,287 new cases in men, representing the 16th-most common cancer in men.<sup>1 3</sup> In the United States, age-adjusted thyroid cancer incidence rate have increased approximately 4-fold from 4.8 cases/100,000 in 1975 to 17.4/100,000 in 2020 such that thyroid cancer incidence has been increased at an annual growth rate of about 3%.<sup>3 4</sup> This significant increase patten was not only unique to the United States but also to a lot of other countries. The growth rate in China was even higher than that in the United States.<sup>5</sup> In China, the estimated incidence of thyroid cancer reached 221,093 in 2020, accounting for about 38% of all annually diagnosed thyroid cancer cases.<sup>3</sup>

Although much of the increasing incidence of thyroid cancer is attributed to the improved detection and screening methods, this is unlikely to be the sole cause, since incidence rates are also obviously increasing among children, adolescents and young adults, or for more easily detectable cases with larger tumours.<sup>6 7</sup> Therefore, it is urgent to elucidate the aetiology of thyroid cancer. There are only a few well-established risk factors for thyroid cancer: gender, hereditary conditions, and ionizing radiation exposure (particularly when this exposure occurs during childhood).<sup>1 2</sup> However, the aetiology remains poorly understood. Recently, a growing body of evidence suggested exposure to persistent organic pollutants (POPs) may play a role in the initiation and development of thyroid cancer, but the results are not conclusive and generally inconsistent across studies.

POPs are a broad class of organic chemicals of global concern, that persist in the environment, bio-magnify and bio-accumulate through the food chain, can be transported all over the world.<sup>8</sup> There are three types of POPs most commonly encountered in the environment: 1) organochlorine pesticides (OCPs), such as dichlorodiphenyltrichloroethane (DDT) and its metabolites; 2) industrial chemicals, such as polychlorinated biphenyls (PCBs) and flame retardants (FRs) including polybrominated diphenyl ethers (PBDEs), brominated FRs (BFRs) and organophosphate FRs (PFRs); and 3) unintentional by-products of industrial processes such as polychlorinated dibenzo-p-dioxins (PCDDs) and polychlorinated dibenzofurans (PCDFs).<sup>9-11</sup>

1  
2  
3  
4 50 In our daily lives, POPs can be virtually detected in many products everywhere. Humans are exposed  
5  
6 51 to POPs in various ways: mainly through diet, but also through the air and the skin absorption.<sup>12,13</sup> For  
7  
8 52 the general population, the most common exposure route is dietary intake of contaminated fatty foods.  
9  
10 53 Due to the bio-magnification and bio-accumulation through the food chain, the highest concentrations  
11  
12 54 of POPs can be found in the human body, as the top of the food chain.<sup>13</sup>

13  
14 55 A lot of evidence supports for their significant adverse effects on human health and the environment.  
15  
16 56 Human exposure to these chemicals, even to low levels of POPs can result in many negative health  
17  
18 57 effects including elevated cancer risk, endocrine disruption, immune function impairment, and  
19  
20 58 reproductive disorders.<sup>13,14</sup> Recently, several epidemiological studies have shown that POP exposure  
21  
22 59 has potential carcinogenesis properties in thyroid cancer.<sup>15-19</sup> However, the findings have been  
23  
24 60 inconsistent. There is only one previous meta-analysis by Han et al. in 2019, which actually focused  
25  
26 61 on the association of pesticides and thyroid cancer risk, but not for all types of POPs.<sup>20</sup>

## 62 **Objectives**

63 We therefore propose to conduct this systematic review and meta-analysis of epidemiological studies  
64  
65 64 to comprehensively summarize the evidence for the effects of exposure to any types of POPs on the  
66  
67 65 incidence risk of thyroid cancer in adult populations. The primary aims of this proposed study are to  
68  
69 66 determine if there is an association between exposure to any types of POPs and the incidence risk of  
70  
71 67 thyroid cancer; and to determine which subtypes of POPs exposure are associated with the thyroid  
72  
73 68 cancer risk. The secondary aims will be to determine which individual POPs chemicals are associated  
74  
75 69 with the thyroid cancer risk.

## 70 **3. METHODS AND ANALYSIS**

71 This study has been registered on PROSPERO (CRD42020181343).<sup>21</sup> The present protocol is in  
72  
73 72 accordance to the PRISMA protocols guidelines (PRISMA-P).<sup>22</sup> This is an original research protocol.  
74  
75 73 Any changes or modifications of the methods stated in this protocol will be updated via PROSPERO  
76  
77 74 and reported in the final systematic review itself. We will report the study according to the PRISMA  
78  
79 75 guidelines (PRISMA).<sup>23</sup>  
80



### 76 **3.1. Eligibility criteria**

77 The Population, Exposure, Comparator and Outcome (PECO) framework was used to clarify the  
78 eligibility criteria.<sup>24</sup>

#### 79 *3.1.1. Types of populations*

80 We included studies of adult populations ( $\geq 18$  years old), while studies of children ( $< 18$  years) were  
81 excluded. Studies that detected and provided exposure levels of individual POPs or any subtype of  
82 POPs in biological samples were included, while studies that used only occupations to estimate the  
83 occupational exposure to POPs were excluded.

#### 84 *3.1.2. Types of exposures*

85 We will include studies of exposure to any types of POPs in accordance with the Stockholm  
86 Convention definition.<sup>8</sup> The exposure level to POPs could be detected directly with quantitative  
87 measurement in biological samples, including blood, urine, thyroid tissues, or adipose tissues.

#### 88 *3.1.3. Types of comparators*

89 The included comparator will be participants with the lowest exposure level of POPs in individual  
90 studies. We will include all these comparisons of the higher exposure levels versus the lowest level of  
91 POPs exposure. When the highest exposure level was used as the comparator in original studies, we  
92 will use the reciprocal method ( $1/x$ ) to convert the effect estimates of the lowest versus the highest  
93 level. We will exclude all other types of comparators.

#### 94 *3.1.4. Types of outcomes*

95 We will include studies that define and classify thyroid cancers using the relevant diagnostic codes in  
96 ICD-10 or other versions of the ICD. If studies do not reported the ICD codes but they provide the  
97 information on the cancer site, we will also include these studies. All patients should be diagnosed  
98 with clinical-pathological confirmation. The following measurements of thyroid cancer cases should

1  
2  
3  
4 99 be determined as eligible: 1) diagnosis by a physician; 2) medical records; 3) health insurance data;  
5  
6 100 and 4) cancer registry data for diagnosis.  
7

8  
9 101 We will exclude all other measurements, including self-reported records without pathological  
10  
11 102 diagnosis. Studies focusing on benign thyroid diseases (including thyroid enlargement and thyroid  
12  
13 103 nodules, etc.) but not thyroid cancer will be excluded from this systematic review.  
14

#### 15 104 *3.1.5. Types of studies*

16  
17  
18 105 We will include a broad set of epidemiological studies that investigate the effect of exposure to POPs  
19  
20 106 and thyroid cancer risk over any period. Eligible study designs will be cohort studies (both prospective  
21  
22 107 and retrospective cohorts), case-cohort studies, case-control studies (including nested case-control  
23  
24 108 studies, population- or hospital-based case-control studies). Due to rigorous ethical principles, there is  
25  
26 109 no eligible randomized controlled trial or non-randomized intervention study in the preliminary  
27  
28 110 search. We will exclude all other study designs (e.g. non-original studies, cross-sectional studies, case  
29  
30 111 reports, case series, animal model researches, cell line researches, and other mechanism researches).  
31  
32

#### 33 112 *3.1.6. Types of effect measures*

34  
35  
36 113 We will include the effect measures of exposure to any individual POPs or any combined subtype of  
37  
38 114 POPs on the risk of developing thyroid cancer, compared with the lowest exposure level in each  
39  
40 115 original research. All relative effect estimates, namely relative risk ratios (RR), odds ratios (OR), and  
41  
42 116 hazard ratios (HR) are included.  
43  
44

45  
46 117 If an original study reports effect estimates from two or more alternative models that have been  
47  
48 118 unadjusted or adjusted for different confounders, then we will systematically prioritize the maximally  
49  
50 119 adjusted estimates from models adjusted for more covariates over those from models adjusted for  
51  
52 120 fewer. For example, if a study presents effect estimates from a crude unadjusted model (Model A), a  
53  
54 121 model adjusted for gender (Model B), and a model adjusted for gender, age, and BMI (Model C), we  
55  
56 122 will then prioritize the estimate from Model C.  
57

### 58 123 ***3.2. Information sources and search***

### 124 3.2.1. *Electronic bibliographic databases*

125 The following databases will be searched from the database inception to May 29, 2020: PubMed,  
126 Embase, ProQuest, and CNKI, with no language restrictions. We will use a combination of Medical  
127 Subject Headings (MeSH) terms and corresponding free-text terms to search relevant literatures and  
128 the full details of search strategy are presented in **online supplementary file 1**.

### 129 3.2.2. *Other electronic database and website search*

130 We will search two additional grey literature databases for potentially eligible studies:

- 131 • Grey Literature Report (<http://greylit.org/>).
- 132 • OpenGrey (<http://www.opengrey.eu/>).

133 We will also search the websites of two international organizations for eligible datasets:

- 134 • World Health Organization ([www.who.int](http://www.who.int)).
- 135 • International Agency for Research on Cancer (<https://www.iarc.fr/>).

### 136 3.2.4. *Hand-searching and expert consultation*

137 We (YXZ, YPL and SSM) will hand-search for potentially eligible studies in:

- 138 • Reference list of all original researches, relevant reviews, editorials, and letters.
- 139 • Reference list of relevant reviews, editorials, and letters.
- 140 • Study records that have cited the included studies (identified in Web of Science citation database).

### 141 3.3. *Study selection*

142 All literature records identified in the search will be imported into the Covidence software<sup>25</sup> and  
143 duplicates will be identified and deleted. Afterwards, two authors (YXZ and YPL) will independently  
144 screen titles and abstracts, and then read full-texts of potentially relevant literatures. Authors will  
145 record specific reasons for exclusion in the full-text screening. A third author (SSM) will resolve any  
146 discrepancies. The process of study selection will be reported as per PRISMA guidelines.

### 147 3.4. *Data extraction and data items*

1  
2  
3  
4 148 Two authors (YXZ and YPL) will independently extract data, and a third author (SSM) will resolve  
5  
6 149 conflicts. The extracted data items will include study characteristics (including authors, publication  
7  
8 150 year, study country, participants age, gender, year of sample collection, and outcome), exposure  
9  
10 151 (including types of POPs, detection methods, comparator ), study design (including summary of study  
11  
12 152 design, statistical analysis models used and effect estimates), risk of bias (including selection bias,  
13  
14 153 reporting bias, confounding bias). We will use the predesigned standard sheet to extract data (see  
15  
16 154 **online supplementary file 2**). This data extraction sheet will be trialled until the authors reach  
17  
18 155 convergence and agreement. Data will be entered into and managed with the Microsoft Excel  
19  
20 156 software. To request missing information, the corresponding author will be contacted by emails  
21  
22 157 (maximum of three emails over four weeks).

### 23 24 158 **3.5. Risk of bias in individual studies**

25  
26  
27 159 Two authors (YXZ and YPL) will independently judge the quality and risk of bias for each study with  
28  
29 160 the Newcastle-Ottawa Scale (NOS).<sup>26</sup> Any discrepancies will be resolved by discussion or consultation  
30  
31 161 with a third author (XDL). All quality assessors will jointly trial the NOS criteria until they have  
32  
33 162 synchronized their understanding and application of the NOS scale. The NOS scale consists of three  
34  
35 163 domains of bias: selection (4 points), comparability (2 points), and outcome (3 points). According to  
36  
37 164 the sum points of three domains, individual studies will be categorized as either high ( $\geq 6$ ) or low ( $< 6$ )  
38  
39 165 quality. We will report the study-level risk of bias assessments by domains in a summary table (**online**  
40  
41 166 **supplementary file 3**).

### 42 43 44 167 **3.6. Synthesis of results**

#### 45 46 47 168 **3.6.1. Quantitative synthesis**

48  
49  
50 169 In the primary meta-analysis, we will use the maximally adjusted effect estimates and corresponding  
51  
52 170 95% confidence intervals (CI) to summarize the effect of POPs exposure on the risk of thyroid cancer.  
53  
54 171 To be more rigorous and conservative, we will use random-effect models rather than fixed-effect  
55  
56 172 models to summarize the effect sizes. In the primary meta-analysis, we will assess the overall effect of  
57  
58 173 exposure to all types of POPs and each subtype of POPs on the thyroid cancer risk. We will also assess  
59  
60 174 the effect of exposure to any individual POPs, if the number of eligible studies is no less than three.

1  
2  
3  
4 175 When two or more studies from the same cohort or data source are eligible for inclusion in the  
5  
6 176 meta-analysis, we will prioritize in this order: 1) the study with the highest quality score and the  
7  
8 177 lowest risk of bias; 2) the study with the most informative measurements of exposure to POPs; 3) the  
9  
10 178 study with large sample size; 4) the study with the longest follow-up; 5) the study with the maximal  
11  
12 179 adjustment for relevant potential confounding factors.

13  
14 180 When studies only report effect sizes for each individual POPs separately, we will initially combine  
15  
16 181 these individual effects into a study-specific overall effect of total or subtype of POPs with  
17  
18 182 fixed-effect models. When studies only report separately effect sizes on each individual types of  
19  
20 183 thyroid cancer, we will also combine these effects into a study-specific overall effect for all types of  
21  
22 184 thyroid cancer with fixed-effect models.

23  
24  
25 185 Comprehensive Meta Analysis version 2.2.046 (Biostat, Englewood, NJ, USA) will be used for all  
26  
27 186 analyses. Statistical significance was defined as two-sided P-values less than 0.05 in the major  
28  
29 187 meta-analysis. In all subgroup analyses, we will use the Bonferroni method to correct the level of  
30  
31 188 statistical significance.

### 32 33 34 189 *3.6.2. Heterogeneity inspection*

35  
36  
37 190 We will calculate the  $I^2$  statistic and perform the Cochran Q-test to test the heterogeneity across  
38  
39 191 studies and will report  $I^2$  statistics and P-values in the systematic review. Based on the  $I^2$  statistics, an  
40  
41 192  $I^2$  value of  $\leq 30\%$  represents low heterogeneity, 30-50% moderate heterogeneity, 50-75% substantial  
42  
43 193 heterogeneity, and  $>75\%$  considerable heterogeneity. If there is substantial between-study  
44  
45 194 heterogeneity, we will perform meta-regression and subgroup analyses to explore potential sources of  
46  
47 195 the heterogeneity. Meta-regression analyses will be performed according to sample size, year of blood  
48  
49 196 sample collection or study publication. Subgroup analyses are elaborated in the section of 3.6.4.  
50  
51 197 Sensitivity analysis.

### 52 53 54 198 *3.6.3. Publication bias*

55  
56  
57 199 To assess potential publication bias, we will conduct the Begg's and Egger's tests and further  
58  
59 200 rigorously adjusted for the summarized results by applying the Duval and Tweedie's trim and fill  
60

1  
2  
3  
4 201 method. We will also use funnel plots to ascertain presence of publication bias, if ten or more eligible  
5 202 studies (datasets or comparisons) are included in our systematic review.  
6  
7

#### 8 203 *3.6.4. Sensitivity analysis*

10  
11 204 We will perform a broad set of predesigned sensitivity analyses to evaluate the robustness of the  
12  
13 205 findings, as follows:

- 14 206 • We will conduct a sensitivity analysis using fixed-effect models.
- 15 207 • The minimally adjusted effect estimates will be pooled and these results will be compared with the  
16 208 primary results from the maximally adjusted effects using the Confounding RR method, which is  
17 209 defined as the ratio of pooled results of the maximally adjusted versus minimally adjusted data.<sup>27</sup>  
18 210 Confounding RRs are used to evaluate whether the underlying confounders controlled in each  
19 211 individual studies could have influenced the results.
- 20 212 • To assess the potential impact of residual confounding bias, we will perform E-value analysis.<sup>28</sup>  
21 213 E-value shows the minimum strength of association that a hypothetical residual confounding factor  
22 214 would need to have with both the exposure to POPs and the incidence risk of thyroid cancer to fully  
23 215 explain the observed effect.
- 24 216 • A sensitivity analysis by removing the most relatively weighted study (or dataset) will be performed  
25 217 to assess its influence on the results and to explore potential sources of heterogeneity across studies.
- 26 218 • A sensitivity analysis including only the high-quality studies will be performed.
- 27 219 • We will also perform a sensitivity analysis by including only the prospective studies (including  
28 220 cohort studies, case-cohort studies, and nested case-control studies), because the prospective nature of  
29 221 these study designs is invaluable for confirming the temporal sequence of POPs exposure and thyroid  
30 222 cancer onset and therefore helps to examine causal associations.
- 31 223 • We will performed predefined subgroup meta-analyses by geographic regions (as per WHO  
32 224 Regions or World Bank Income Country Groups), sample size ( $\geq$ median vs.  $<$ median), year of blood  
33 225 sample collection (before vs. after 2010), gender (female vs. male), and age of participants ( $<$ 50 vs.  
34 226  $\geq$ 50 years), if eligible studies in each subgroup are no less than three. If else, these afore-mentioned  
35 227 subgroup analyses will be performed as sensitivity analyses by excluding the subgroup with less than  
36 228 three studies.

229 • We will also perform cumulative meta-analyses according to sample size of each individual studies  
230 from small to large, year of blood drawing or study publication in chronological order from front to  
231 latest.

232 We will also perform some post hoc subgroup analyses or other additional analyses, whenever  
233 feasible.

### 234 **3.7. *Quality of evidence assessment***

235 All authors will together assess quality of evidence for the entire body of evidence by exposures (total  
236 POPs or subtypes of POPs). We will use the GRADE approach to grade the quality of evidence as  
237 “high”, “moderate”, “low”, or “very low”.<sup>29</sup> The GRADEproGDT software online version will be used  
238 to summarize the quality of evidence.

239 We will downgrade or upgrade the quality of evidence according to the following domains: 1) study  
240 design; 2) risk of bias; 3) inconsistency; 4) indirectness; 5) imprecision; 6) publication bias; and 7)  
241 confounding bias. Within each domain, we will categorize the concern for the quality of evidence as  
242 “none”, “serious” and “very serious”. In the meta-analysis, if the prospective epidemiological studies  
243 (including cohort, case-cohort, and nested case-control studies) accounted for more than 60% of all  
244 included studies, we will start at “high” for the quality of evidence; or else, we will start at  
245 “moderate”. Afterwards, we will downgrade the quality of evidence for no concern by nil grades (0),  
246 for a serious concern by one grade (-1), or for a very serious concern by two grades (-2). We will  
247 upgrade the quality by one grade for each of the following reasons: large effect size (+1), a significant  
248 dose-response relationship (+1), or plausibility that residual confounders cannot explain the observed  
249 effect (+1).

250 For example, we start at “moderate” for a body of evidence consisting of 10 studies (including 5  
251 cohorts and 5 case-control studies). If there is a serious concern for both risk of bias (-1) and  
252 inconsistency (-1), meanwhile the summarized effect size is large (+1); but there is no other concerns  
253 and no other upgrading reasons, then we will downgrade the quality by one grade from “moderate” to  
254 “low”.

255

1  
2  
3  
4 256 **3.8. Patient and public involvement**  
5

6 257 Patients and the public were not involved in the design, conduct, or reporting of our present study.  
7  
8  
9

10 258 **Ethics and Dissemination:** Ethical approval is not required in this systematic review of published  
11  
12 259 literatures. The results will be published in a peer-reviewed journal and presented at relevant  
13  
14 260 conferences to promote knowledge transfer.  
15  
16

17 261 **Availability of data and materials:** Data collected through this systematic review will be managed  
18  
19 262 by the present Research Group. The datasets used and/or analyses during the study will be presented  
20  
21 263 within the manuscript or as supplementary materials. We promise that all the datasets analysed in this  
22  
23 264 study will be publicly available for the general readers and researchers.  
24  
25

26 265 **Author Contributions:** **YXZ**, **YPL**, **ZYQ** and **SMM** conceived and designed this systematic review.  
27  
28 266 All authors developed the selection criteria, risk bias assessment strategy, and data extraction criteria.  
29  
30 267 **YXZ**, **YPL** and **SSM** developed the pilot search strategy. **YXZ** and **YPL** will be the two title, abstract,  
31  
32 268 and full-text reviewers. **SSM** or **XDL** will be the third reviewer that will help resolve any discrepancy.  
33  
34 269 **YXZ** and **YPL** wrote the initial draft of the protocol. All authors revised the manuscript critically for  
35  
36 270 important intellectual content. All authors approved the final version of the systematic review to be  
37  
38 271 published: All authors. **ZYQ** and **SMM** are the guarantor of the systematic review.  
39  
40

41 272 **Funding statement:** This work was supported by the Natural Science Foundation of Heilongjiang  
42  
43 273 Province (YQ2019H021 to YPL); the China Postdoctoral Science Foundation (2018M641875 to  
44  
45 274 YPL); the Basic Medical and Health Science Project of Wenzhou Science and Technology Bureau  
46  
47 275 (Y20190191 to YPL). The funders and sponsors had no role in the design and conduct of the study;  
48  
49 276 collection, management, analysis, and interpretation of the data; preparation, review, or approval of  
50  
51 277 the manuscript; and decision to submit the manuscript for publication.  
52  
53

54 278 **Conflict of Interest:** The authors declare that they have no competing financial interests or personal  
55  
56 279 relationships that could have appeared to influence the writing and the publication of this work.  
57  
58  
59  
60



280 **REFERENCES**

- 281 1. Bray F, Ferlay J, Soerjomataram I, et al. Global cancer statistics 2018: GLOBOCAN estimates of  
282 incidence and mortality worldwide for 36 cancers in 185 countries. *CA Cancer J Clin*  
283 2018;68(6):394-424.
- 284 2. American Cancer Society. Thyroid Cancer. Available at:  
285 <https://www.cancer.org/cancer/thyroid-cancer.html>. (Accessed November 22, 2020).
- 286 3. Ferlay J, Ervik M, Lam F, et al. Global Cancer Observatory: Cancer Today. Lyon, France:  
287 International Agency for Research on Cancer. Available at: <https://gco.iarc.fr/today/home>.  
288 (Accessed November 22, 2020).
- 289 4. Lim H, Devesa SS, Sosa JA, et al. Trends in Thyroid Cancer Incidence and Mortality in the United  
290 States, 1974-2013. *JAMA* 2017;317(13):1338-48.
- 291 5. Frank W, Dillwyn W. Thyroid cancer. In: Stewart BW and Wild CP, eds. World Cancer Report  
292 2014. Lyon, France, International Agency for Research on Cancer, WHO Press; 2014:738-750. .
- 293 6. Qian ZJ, Jin MC, Meister KD, et al. Pediatric Thyroid Cancer Incidence and Mortality Trends in the  
294 United States, 1973-2013. *JAMA Otolaryngol Head Neck Surg* 2019;145(7):617-23.
- 295 7. Bernier MO, Withrow DR, Berrington de Gonzalez A, et al. Trends in pediatric thyroid cancer  
296 incidence in the United States, 1998-2013. *Cancer* 2019;125(14):2497-505.
- 297 8. Stockholm Convention. The POPs. Available at:  
298 <http://www.pops.int/TheConvention/ThePOPs/tabid/673/Default.aspx>. (Accessed November 22,  
299 2020).
- 300 9. European Commission Environment Chemicals. Persistent Organic Pollutants (POPs). Available at:  
301 [https://ec.europa.eu/environment/chemicals/international\\_conventions/index\\_en.htm](https://ec.europa.eu/environment/chemicals/international_conventions/index_en.htm). (Accessed  
302 November 22, 2020).
- 303 10. Guo W, Pan B, Sakkiah S, et al. Persistent Organic Pollutants in Food: Contamination Sources,  
304 Health Effects and Detection Methods. *Int J Environ Res Public Health* 2019;16(22)
- 305 11. United States Environmental Protection Agency. International Cooperation. Persistent Organic  
306 Pollutants: A Global Issue, A Global Response. Available at:  
307 [https://www.epa.gov/international-cooperation/persistent-organic-pollutants-global-issue-global-res  
309 ponse#pops](https://www.epa.gov/international-cooperation/persistent-organic-pollutants-global-issue-global-res<br/>308 ponse#pops). (Accessed December 02, 2020).
- 309 12. Abdallah MA, Pawar G, Harrad S. Evaluation of in vitro vs. in vivo methods for assessment of  
310 dermal absorption of organic flame retardants: a review. *Environ Int* 2015;74:13-22.
- 311 13. World Health Organization. Food safety: Persistent organic pollutants (POPs). Available at:  
312 [https://www.who.int/news-room/q-a-detail/food-safety-persistent-organic-pollutants-\(pops\)](https://www.who.int/news-room/q-a-detail/food-safety-persistent-organic-pollutants-(pops)).  
313 (Accessed November 22, 2020).
- 314 14. Ashraf MA. Persistent organic pollutants (POPs): a global issue, a global challenge. *Environ Sci*  
315 *Pollut Res Int* 2017;24(5):4223-27.
- 316 15. Zhang Q, Hu M, Wu H, et al. Plasma polybrominated diphenyl ethers, urinary heavy metals and  
317 the risk of thyroid cancer: A case-control study in China. *Environ Pollut* 2020:116162.

- 1  
2  
3 318 16. Huang H, Sjodin A, Chen Y, et al. Polybrominated Diphenyl Ethers, Polybrominated Biphenyls,  
4 319 and Risk of Papillary Thyroid Cancer: A Nested Case-Control Study. *Am J Epidemiol*  
5 320 2020;189(2):120-32.  
6  
7  
8 321 17. Han X, Meng L, Li Y, et al. Associations between Exposure to Persistent Organic Pollutants and  
9 322 Thyroid Function in a Case-Control Study of East China. *Environ Sci Technol*  
10 323 2019;53(16):9866-75.  
11  
12 324 18. Marotta V, Russo G, Gambardella C, et al. Human exposure to bisphenol AF and  
13 325 diethylhexylphthalate increases susceptibility to develop differentiated thyroid cancer in patients  
14 326 with thyroid nodules. *Chemosphere* 2019;218:885-94.  
15  
16 327 19. Deziel NC, Warren JL, Huang H, et al. Exposure to polychlorinated biphenyls and organochlorine  
17 328 pesticides and thyroid cancer in connecticut women. *Environ Res* 2021;192:110333.  
18  
19 329 20. Han MA, Kim JH, Song HS. Persistent organic pollutants, pesticides, and the risk of thyroid  
20 330 cancer: systematic review and meta-analysis. *Eur J Cancer Prev* 2019;28(4):344-49.  
21  
22 331 21. Liu Y, Zhang Y, Qu Z, et al. Associations between exposure to persistent organic pollutants and  
23 332 the risk of thyroid cancer: A systematic review and meta-analysis. PROSPERO 2020  
24 333 CRD42020181343. Available from:  
25 334 [https://www.crd.york.ac.uk/prospero/display\\_record.php?ID=CRD42020181343](https://www.crd.york.ac.uk/prospero/display_record.php?ID=CRD42020181343).  
26  
27 335 22. Shamseer L, Moher D, Clarke M, et al. Preferred reporting items for systematic review and  
28 336 meta-analysis protocols (PRISMA-P) 2015: elaboration and explanation. *BMJ* 2015;350:g7647.  
29  
30 337 23. Liberati A, Altman DG, Tetzlaff J, et al. The PRISMA statement for reporting systematic reviews  
31 338 and meta-analyses of studies that evaluate healthcare interventions: explanation and elaboration.  
32 339 *BMJ* 2009;339:b2700.  
33  
34 340 24. Morgan RL, Whaley P, Thayer KA, et al. Identifying the PECO: A framework for formulating  
35 341 good questions to explore the association of environmental and other exposures with health  
36 342 outcomes. *Environ Int* 2018;121(Pt 1):1027-31.  
37  
38 343 25. Covidence Community. Covidence, 2020. Available at:  
39 344 <https://community.cochrane.org/help/tools-and-software/covidence>. (Accessed Nov 25, 2020).  
40  
41 345 26. Wells GA, Shea B, O'Connell D, et al. The Newcastle -Ottawa Scale (NOS) for assessing the  
42 346 quality if nonrandomized studies in meta-analyses. Available at:  
43 347 [http://www.ohri.ca/programs/clinical\\_epidemiology/oxford.asp](http://www.ohri.ca/programs/clinical_epidemiology/oxford.asp). (Accessed December 16, 2020).  
44  
45 348 27. Greenland S, Pearce N. Statistical foundations for model-based adjustments. *Annu Rev Public*  
46 349 *Health* 2015;36:89-108.  
47  
48 350 28. VanderWeele TJ, Ding P. Sensitivity Analysis in Observational Research: Introducing the  
49 351 E-Value. *Ann Intern Med* 2017;167(4):268-74.  
50  
51 352 29. Guyatt GH, Oxman AD, Vist GE, et al. GRADE: an emerging consensus on rating quality of  
52 353 evidence and strength of recommendations. *BMJ* 2008;336(7650):924-6.  
53  
54  
55  
56  
57  
58  
59  
60

1  
2  
3  
4  
5  
6  
7  
8  
9  
10  
11  
12  
13  
14  
15  
16  
17  
18  
19  
20  
21  
22  
23  
24  
25  
26  
27  
28  
29  
30  
31  
32  
33  
34  
35  
36  
37  
38  
39  
40  
41  
42  
43  
44  
45  
46  
47  
48  
49  
50  
51  
52  
53  
54  
55  
56  
57  
58  
59  
60

**ONLINE SUPPLEMENTARY FILES**

For peer review only

## Supplementary File 1. Detailed Electronic Search strategy.

### • PubMed:

#1. "persistent organic pollutants"[MeSH Terms] OR "ddt"[MeSH Terms] OR "chlordan"[MeSH Terms] OR "aldrin"[MeSH Terms] OR "dieldrin"[MeSH Terms] OR "endrin"[MeSH Terms] OR "heptachlor"[MeSH Terms] OR "hexachlorobenzene"[MeSH Terms] OR "mirex"[MeSH Terms] OR "toxaphene"[MeSH Terms] OR "chlordecone"[MeSH Terms] OR "polychlorinated biphenyls"[MeSH Terms] OR "halogenated diphenyl ethers"[MeSH Terms] OR "dibenzofurans, polychlorinated"[MeSH Terms] OR "dioxins"[MeSH Terms] OR "dioxins and dioxin like compounds"[MeSH Terms] OR "polychlorinated dibenzodioxins"[MeSH Terms]

#2. "pentachlorobenzene"[Supplementary Concept] OR "decabromobiphenyl ether"[Supplementary Concept] OR "2 2 4 4 5 6 hexabromodiphenyl ether"[Supplementary Concept] OR "perfluorooctane sulfonic acid"[Supplementary Concept] OR "perfluorooctanoic acid"[Supplementary Concept]

#3. "persistent organic pollutants"[Title/Abstract] OR "persistent organic pollutant"[Title/Abstract] OR "POPs"[Title/Abstract] OR "organochlorine pesticides"[Title/Abstract] OR "OCPs"[Title/Abstract] OR "ddt"[Title/Abstract] OR "chlordan"[Title/Abstract] OR "aldrin"[Title/Abstract] OR "dieldrin"[Title/Abstract] OR "endrin"[Title/Abstract] OR "heptachlor"[Title/Abstract] OR "hexachlorobenzene"[Title/Abstract] OR "mirex"[Title/Abstract] OR "toxaphene"[Title/Abstract] OR "chlordecone"[Title/Abstract] OR "pentachlorobenzene"[Title/Abstract] OR "polychlorinated biphenyls"[Title/Abstract] OR "PCBs"[Title/Abstract] OR "polychlorinated naphthalenes"[Title/Abstract] OR "halogenated diphenyl ethers"[Title/Abstract] OR "polybrominated diphenyl ethers"[Title/Abstract] OR "PBDEs"[Title/Abstract] OR "c-decaBDE"[Title/Abstract] OR "dibenzofurans polychlorinated"[Title/Abstract] OR "dioxins"[Title/Abstract] OR "dioxins and dioxin like compounds"[Title/Abstract] OR "polychlorinated dibenzodioxins"[Title/Abstract] OR "decabromobiphenyl ether"[Title/Abstract] OR "2 2 4 4 5 6 hexabromodiphenyl ether"[Title/Abstract] OR "perfluorooctane sulfonic acid"[Title/Abstract] OR "perfluorooctanoic acid"[Title/Abstract] OR "PFOS"[Title/Abstract] OR "PFOA"[Title/Abstract]

#4. #1 OR #2 OR #3

#5. "thyroid neoplasms"[MeSH Terms]

#6. "thyroid neoplasm"[All Fields] OR "thyroid carcinomas"[All Fields] OR "thyroid carcinoma"[All Fields] OR "thyroid cancers"[All Fields] OR "thyroid cancer"[All Fields] OR "thyroid adenomas"[All Fields] OR "thyroid adenoma"[All Fields] OR "thyroid tumours"[All Fields] OR "thyroid tumour"[All Fields]

#7. #5 OR #6

#8. #4 AND #7

1  
2  
3  
4 • **Embase:**  
5

6 #1. 'persistent organic pollutants':ti,ab,kw OR 'persistent organic pollutant':ti,ab,kw OR POPs:ti,ab,kw OR  
7 'organochlorine pesticides':ti,ab,kw OR OCPs:ti,ab,kw OR DDT:ti,ab,kw OR chlordan:ti,ab,kw OR  
8 aldrin:ti,ab,kw OR dieldrin:ti,ab,kw OR endrin:ti,ab,kw OR heptachlor:ti,ab,kw OR  
9 hexachlorobenzene:ti,ab,kw OR mirex:ti,ab,kw OR toxaphene:ti,ab,kw OR chlordecone:ti,ab,kw OR  
10 'pentachlorobenzene':ti,ab,kw OR 'polychlorinated biphenyls':ti,ab,kw OR PCBs:ti,ab,kw OR 'polychlorinated  
11 naphthalenes':ti,ab,kw OR 'halogenated diphenyl ethers':ti,ab,kw OR 'polybrominated diphenyl  
12 ethers':ti,ab,kw OR PBDEs:ti,ab,kw OR c-decaBDE:ti,ab,kw OR 'dibenzofurans polychlorinated':ti,ab,kw OR  
13 dioxins:ti,ab,kw OR 'dioxins and dioxin like compounds':ti,ab,kw OR 'polychlorinated  
14 dibenzodioxins':ti,ab,kw OR 'decabromobiphenyl ether':ti,ab,kw OR '2 2 4 4 5 6 hexabromodiphenyl  
15 ether':ti,ab,kw OR 'perfluorooctane sulfonic acid':ti,ab,kw OR 'perfluorooctanoic acid':ti,ab,kw OR  
16 PFOS:ti,ab,kw OR PFOA:ti,ab,kw  
17

18 #2. 'thyroid neoplasms':ti,ab,kw OR 'thyroid neoplasm':ti,ab,kw OR 'thyroid carcinomas':ti,ab,kw OR 'thyroid  
19 carcinoma':ti,ab,kw OR 'thyroid cancers':ti,ab,kw OR 'thyroid cancer':ti,ab,kw OR 'thyroid adenomas':ti,ab,kw  
20 OR 'thyroid adenoma':ti,ab,kw OR 'thyroid tumours':ti,ab,kw OR 'thyroid tumour':ti,ab,kw  
21

22 #3. #1 AND #2  
23

24 • **ProQuest:**  
25

26 #1. mesh(persistent organic pollutants) OR mesh(DDT) OR mesh(chlordan) OR mesh(aldrin) OR  
27 mesh(dieldrin) OR mesh(endrin) OR mesh(heptachlor) OR mesh(hexachlorobenzene) OR mesh(mirex) OR  
28 mesh(toxaphene) OR mesh(chlordecone) OR mesh(polychlorinated biphenyls) OR mesh(halogenated  
29 diphenyl ethers) OR mesh(dibenzofurans, polychlorinated) OR mesh(dioxins) OR mesh(dioxins and dioxin  
30 like compounds) OR mesh(polychlorinated dibenzodioxins) OR mesh(pentachlorobenzene) OR  
31 mesh(decabromobiphenyl ether) OR mesh(2 2 4 4 5 6 hexabromodiphenyl ether) OR mesh(perfluorooctane  
32 sulfonic acid) OR mesh(perfluorooctanoic acid)  
33

34 #2. ab(persistent organic pollutants) OR ab(persistent organic pollutant) OR ab(POPs) OR ab(organochlorine  
35 pesticides) OR ab(OCPs) OR ab(DDT) OR ab(chlordan) OR ab(aldrin) OR ab(dieldrin) OR ab(endrin) OR  
36 ab(heptachlor) OR ab(hexachlorobenzene) OR ab(mirex) OR ab(toxaphene) OR ab(chlordecone) OR  
37 ab(pentachlorobenzene) OR ab(polychlorinated biphenyls) OR ab(PCBs) OR ab(polychlorinated  
38 naphthalenes) OR ab(halogenated diphenyl ethers) OR ab(polybrominated diphenyl ethers) OR ab(PBDEs)  
39 OR ab(c-decaBDE) OR ab(dibenzofurans polychlorinated) OR ab(dioxins) OR ab(dioxins and dioxin like  
40 compounds) OR ab(polychlorinated dibenzodioxins) OR ab(decabromobiphenyl ether) OR ab(2 2 4 4 5 6  
41 hexabromodiphenyl ether) OR ab(perfluorooctane sulfonic acid) OR ab(perfluorooctanoic acid) OR ab(PFOS)  
42 OR ab(PFOA)  
43  
44  
45  
46  
47  
48  
49  
50  
51  
52  
53  
54  
55  
56  
57  
58  
59  
60

1  
2  
3 #3. #1 OR #2  
4  
5

6 #4. mesh(thyroid neoplasms)  
7

8 #5. ab(thyroid neoplasm) OR ab(thyroid carcinomas) OR ab(thyroid carcinoma) OR ab(thyroid cancers) OR  
9 ab(thyroid cancer) OR ab(thyroid adenomas) OR ab(thyroid adenoma) OR ab(thyroid tumours) OR ab(thyroid  
10 tumour)  
11  
12

13 #6. #4 OR #5  
14  
15

16 #7. #3 AND #6  
17  
18

19 • CNKI:  
20

21  
22 #1. SU=持久性有机污染物 OR SU=POPs OR SU=有机氯杀虫剂 OR SU=DDT OR SU=氯丹 OR SU=艾  
23 氏剂 OR SU=狄氏剂 OR SU=异狄氏剂 OR SU=七氯 OR SU=六氯苯 OR SU=灭蚁灵 OR SU=毒杀芬  
24 OR SU=十氯酮 OR SU=五氯苯 OR SU=多氯联苯 OR SU=PCBs OR SU=多氯化萘 OR SU=卤代苯醚  
25 OR SU=多溴联苯醚 OR SU=PBDEs OR SU=呋喃 OR SU=二恶英 OR SU=多氯二苯并二恶英 OR SU=  
26 十溴二苯醚 OR SU=六溴二苯醚 OR SU=全氟辛烷磺酸 OR SU=全氟辛酸 OR SU=persistent organic  
27 pollutants OR SU=organochlorine pesticides OR SU=polychlorinated biphenyls OR SU=halogenated  
28 diphenyl ethers OR SU=polybrominated diphenyl ethers  
29  
30  
31  
32

33  
34 #2. KY=持久性有机污染物 OR KY=POPs OR KY=有机氯杀虫剂 OR KY=DDT OR KY=氯丹 OR KY=  
35 艾氏剂 OR KY=狄氏剂 OR KY=异狄氏剂 OR KY=七氯 OR KY=六氯苯 OR KY=灭蚁灵 OR KY=毒  
36 杀芬 OR KY=十氯酮 OR KY=五氯苯 OR KY=多氯联苯 OR KY=PCBs OR KY=多氯化萘 OR KY=卤  
37 代苯醚 OR KY=多溴联苯醚 OR KY=PBDEs OR KY=呋喃 OR KY=二恶英 OR KY=多氯二苯并二恶  
38 英 OR KY=十溴二苯醚 OR KY=六溴二苯醚 OR KY=全氟辛烷磺酸 OR KY=全氟辛酸 OR  
39 KY=persistent organic pollutants OR KY=organochlorine pesticides OR KY=polychlorinated biphenyls OR  
40 KY=halogenated diphenyl ethers OR KY=polybrominated diphenyl ethers  
41  
42  
43  
44

45 #3. #1 OR #2  
46

47 #4. SU=甲状腺癌 OR SU=甲状腺肿瘤 OR SU=thyroid cancer OR SU=thyroid neoplasms  
48  
49

50 #5. KY=甲状腺癌 OR KY=甲状腺肿瘤 OR KY= thyroid cancer OR KY= thyroid neoplasms  
51  
52

53 #6. #4 OR #5  
54  
55

56 #7. #3 AND #6  
57  
58  
59  
60

**Supplementary File 2.** Main Characteristics extracted from individual studies included in this study.

| Study   | Study characteristics          |              |                                     |                                | Population characteristics                                  |                   |             | Exposure characteristics                |                     |              | Outcomes characteristics |            |          |                 | Quality score (NOS) |                  |
|---------|--------------------------------|--------------|-------------------------------------|--------------------------------|-------------------------------------------------------------|-------------------|-------------|-----------------------------------------|---------------------|--------------|--------------------------|------------|----------|-----------------|---------------------|------------------|
|         | First author, Publication year | Study design | Study implementation period (year), | Sample collection time (year), | Mean/median duration of follow-up (months), only for cohort | Country or region | Sample size | Age Median (range)/Mean age (SD), years | Gender Female /Male | Type of POPs | Detection method         | Comparator | Outcomes | Analysis models |                     | Effect estimates |
| Study 1 |                                |              |                                     |                                |                                                             |                   |             |                                         |                     |              |                          |            |          |                 |                     |                  |
| Study 2 |                                |              |                                     |                                |                                                             |                   |             |                                         |                     |              |                          |            |          |                 |                     |                  |
| Study 3 |                                |              |                                     |                                |                                                             |                   |             |                                         |                     |              |                          |            |          |                 |                     |                  |
| Study 4 |                                |              |                                     |                                |                                                             |                   |             |                                         |                     |              |                          |            |          |                 |                     |                  |
| Study 5 |                                |              |                                     |                                |                                                             |                   |             |                                         |                     |              |                          |            |          |                 |                     |                  |
| Study 6 |                                |              |                                     |                                |                                                             |                   |             |                                         |                     |              |                          |            |          |                 |                     |                  |
| ...     |                                |              |                                     |                                |                                                             |                   |             |                                         |                     |              |                          |            |          |                 |                     |                  |

**Supplementary File 3.** Detailed quality scores of individual studies assessed with the Newcastle-Ottawa Quality Assessment Scale (NOS).

| Study   | Selection                        |                                 |                       |                        | Comparability                                |                                          | Exposure                  |                                                     |                   | Total Score |
|---------|----------------------------------|---------------------------------|-----------------------|------------------------|----------------------------------------------|------------------------------------------|---------------------------|-----------------------------------------------------|-------------------|-------------|
|         | Is the case definition adequate? | Representativeness of the cases | Selection of controls | Definition of controls | Study controls for the most important factor | Study controls for any additional factor | Ascertainment of exposure | Same method of ascertainment for cases and controls | Non-response rate |             |
| Study 1 | √                                | √                               | -                     | -                      | -                                            | √                                        | √                         | √                                                   | √                 | 6           |
| Study 2 | √                                | √                               | √                     |                        | √                                            | √                                        | √                         | √                                                   | √                 | 8           |
| Study 3 | √                                | √                               | √                     | √                      | √                                            | √                                        | √                         | √                                                   | √                 | 9           |
| Study 4 | √                                | √                               | √                     | √                      | -                                            | -                                        | √                         | √                                                   | √                 | 7           |
| Study 5 | √                                | √                               | √                     | √                      | √                                            | -                                        | √                         | √                                                   | √                 | 8           |
| Study 6 | √                                | -                               | √                     | √                      | -                                            | -                                        | √                         | -                                                   | -                 | 4           |
| ...     |                                  |                                 |                       |                        |                                              |                                          |                           |                                                     |                   |             |



**PRISMA-P 2015 checklist**

| Section and topic                 | Item No | Checklist item                                                                                                                                                                                                                | Page(s)                                  |
|-----------------------------------|---------|-------------------------------------------------------------------------------------------------------------------------------------------------------------------------------------------------------------------------------|------------------------------------------|
| <b>ADMINISTRATIVE INFORMATION</b> |         |                                                                                                                                                                                                                               |                                          |
| Title:                            |         |                                                                                                                                                                                                                               |                                          |
| Identification                    | 1a      | Identify the report as a protocol of a systematic review                                                                                                                                                                      | Title page                               |
| Update                            | 1b      | If the protocol is for an update of a previous systematic review, identify as such                                                                                                                                            | Not applicable                           |
| Registration                      | 2       | If registered, provide the name of the registry (such as PROSPERO) and registration number                                                                                                                                    | Page 2                                   |
| Authors:                          |         |                                                                                                                                                                                                                               |                                          |
| Contact                           | 3a      | Provide name, institutional affiliation, e-mail address of all protocol authors; provide physical mailing address of corresponding author                                                                                     | Title page                               |
| Contributions                     | 3b      | Describe contributions of protocol authors and identify the guarantor of the review                                                                                                                                           | Page 12                                  |
| Amendments                        | 4       | If the protocol represents an amendment of a previously completed or published protocol, identify as such and list changes; otherwise, state plan for documenting important protocol amendments                               | Not applicable                           |
| Support:                          |         |                                                                                                                                                                                                                               |                                          |
| Sources                           | 5a      | Indicate sources of financial or other support for the review                                                                                                                                                                 | Page 12                                  |
| Sponsor                           | 5b      | Provide name for the review funder and/or sponsor                                                                                                                                                                             | Page 12                                  |
| Role of sponsor or funder         | 5c      | Describe roles of funder(s), sponsor(s), and/or institution(s), if any, in developing the protocol                                                                                                                            | Page 12                                  |
| <b>INTRODUCTION</b>               |         |                                                                                                                                                                                                                               |                                          |
| Rationale                         | 6       | Describe the rationale for the review in the context of what is already known                                                                                                                                                 | Page 3-4                                 |
| Objectives                        | 7       | Provide an explicit statement of the question(s) the review will address with reference to participants, interventions, comparators, and outcomes (PICO)                                                                      | Page 4, 5                                |
| <b>METHODS</b>                    |         |                                                                                                                                                                                                                               |                                          |
| Eligibility criteria              | 8       | Specify the study characteristics (such as PICO, study design, setting, time frame) and report characteristics (such as years considered, language, publication status) to be used as criteria for eligibility for the review | Page 5-6                                 |
| Information sources               | 9       | Describe all intended information sources (such as electronic databases, contact with study authors, trial registers or other grey literature sources) with planned dates of coverage                                         | Page 7                                   |
| Search strategy                   | 10      | Present draft of search strategy to be used for at least one electronic database, including planned limits, such that it could be repeated                                                                                    | Page 7 and online supplementary file 1   |
| Study records:                    |         |                                                                                                                                                                                                                               |                                          |
| Data management                   | 11a     | Describe the mechanism(s) that will be used to manage records and data throughout the review                                                                                                                                  | Page 7                                   |
| Selection process                 | 11b     | State the process that will be used for selecting studies (such as two independent reviewers) through each phase of the review (that is, screening, eligibility and inclusion in meta-analysis)                               | Page 7                                   |
| Data collection process           | 11c     | Describe planned method of extracting data from reports (such as piloting forms, done independently, in duplicate), any processes for obtaining and confirming data from investigators                                        | Page 7 and online supplementary file 2   |
| Data items                        | 12      | List and define all variables for which data will be sought (such as PICO items, funding sources), any pre-planned data assumptions and simplifications                                                                       | Page 7-8 and online supplementary file 2 |
| Outcomes and prioritization       | 13      | List and define all outcomes for which data will be sought, including prioritization of main and additional outcomes, with rationale                                                                                          | Page 5-6                                 |

|                                    |     |                                                                                                                                                                                                                                                  |                |
|------------------------------------|-----|--------------------------------------------------------------------------------------------------------------------------------------------------------------------------------------------------------------------------------------------------|----------------|
| Risk of bias in individual studies | 14  | Describe anticipated methods for assessing risk of bias of individual studies, including whether this will be done at the outcome or study level, or both; state how this information will be used in data synthesis                             | Page 8         |
| Data synthesis                     | 15a | Describe criteria under which study data will be quantitatively synthesised                                                                                                                                                                      | Page 8-9       |
|                                    | 15b | If data are appropriate for quantitative synthesis, describe planned summary measures, methods of handling data and methods of combining data from studies, including any planned exploration of consistency (such as $I^2$ , Kendall's $\tau$ ) | Page 8-10      |
|                                    | 15c | Describe any proposed additional analyses (such as sensitivity or subgroup analyses, meta-regression)                                                                                                                                            | Page 10-11     |
|                                    | 15d | If quantitative synthesis is not appropriate, describe the type of summary planned                                                                                                                                                               | Not applicable |
| Meta-bias(es)                      | 16  | Specify any planned assessment of meta-bias(es) (such as publication bias across studies, selective reporting within studies)                                                                                                                    | Page 9-11      |
| Confidence in cumulative evidence  | 17  | Describe how the strength of the body of evidence will be assessed (such as GRADE)                                                                                                                                                               | Page 11        |

From: Shamseer L, Moher D, Clarke M, Ghersi D, Liberati A, Petticrew M, Shekelle P, Stewart L, PRISMA-P Group. Preferred reporting items for systematic review and meta-analysis protocols (PRISMA-P) 2015: elaboration and explanation. *BMJ*. 2015 Jan 2;349(jan02 1):g7647.

# BMJ Open

## Exposure to persistent organic pollutants and thyroid cancer risk: a study protocol of systematic review and meta-analysis

|                                 |                                                                                                                                                                                                                                                                                                                                                                                                                                                                                                                                     |
|---------------------------------|-------------------------------------------------------------------------------------------------------------------------------------------------------------------------------------------------------------------------------------------------------------------------------------------------------------------------------------------------------------------------------------------------------------------------------------------------------------------------------------------------------------------------------------|
| Journal:                        | <i>BMJ Open</i>                                                                                                                                                                                                                                                                                                                                                                                                                                                                                                                     |
| Manuscript ID                   | bmjopen-2020-048451.R1                                                                                                                                                                                                                                                                                                                                                                                                                                                                                                              |
| Article Type:                   | Protocol                                                                                                                                                                                                                                                                                                                                                                                                                                                                                                                            |
| Date Submitted by the Author:   | 02-Jul-2021                                                                                                                                                                                                                                                                                                                                                                                                                                                                                                                         |
| Complete List of Authors:       | Zhang, Yuxue; Harbin Medical University, Department of Preventive Medicine<br>Liu, YuPeng; Wenzhou Medical University, Department of Epidemiology and Biostatistics<br>Miao, SuSheng; Harbin Medical University, Department of Head and Neck Surgery<br>Liu, Xiaodong; Wenzhou Medical University, Department of Occupational and Environmental Health<br>Ma, ShuMei; Wenzhou Medical University, Department of Occupational and Environmental Health<br>Qu, ZhangYi; Harbin Medical University, Department of Hygiene Microbiology |
| <b>Primary Subject Heading</b>: | Public health                                                                                                                                                                                                                                                                                                                                                                                                                                                                                                                       |
| Secondary Subject Heading:      | Oncology, Epidemiology, Occupational and environmental medicine, Public health                                                                                                                                                                                                                                                                                                                                                                                                                                                      |
| Keywords:                       | PUBLIC HEALTH, Thyroid disease < DIABETES & ENDOCRINOLOGY, Endocrine tumours < ONCOLOGY, Epidemiology < ONCOLOGY                                                                                                                                                                                                                                                                                                                                                                                                                    |
|                                 |                                                                                                                                                                                                                                                                                                                                                                                                                                                                                                                                     |

SCHOLARONE™  
Manuscripts



I, the Submitting Author has the right to grant and does grant on behalf of all authors of the Work (as defined in the below author licence), an exclusive licence and/or a non-exclusive licence for contributions from authors who are: i) UK Crown employees; ii) where BMJ has agreed a CC-BY licence shall apply, and/or iii) in accordance with the terms applicable for US Federal Government officers or employees acting as part of their official duties; on a worldwide, perpetual, irrevocable, royalty-free basis to BMJ Publishing Group Ltd ("BMJ") its licensees and where the relevant Journal is co-owned by BMJ to the co-owners of the Journal, to publish the Work in this journal and any other BMJ products and to exploit all rights, as set out in our [licence](#).

The Submitting Author accepts and understands that any supply made under these terms is made by BMJ to the Submitting Author unless you are acting as an employee on behalf of your employer or a postgraduate student of an affiliated institution which is paying any applicable article publishing charge ("APC") for Open Access articles. Where the Submitting Author wishes to make the Work available on an Open Access basis (and intends to pay the relevant APC), the terms of reuse of such Open Access shall be governed by a Creative Commons licence – details of these licences and which [Creative Commons](#) licence will apply to this Work are set out in our licence referred to above.

Other than as permitted in any relevant BMJ Author's Self Archiving Policies, I confirm this Work has not been accepted for publication elsewhere, is not being considered for publication elsewhere and does not duplicate material already published. I confirm all authors consent to publication of this Work and authorise the granting of this licence.

Title page:

**Exposure to persistent organic pollutants and thyroid cancer risk: a study protocol of systematic review and meta-analysis**

YuXue Zhang<sup>1#</sup>, YuPeng Liu<sup>2#</sup>, SuSheng Miao<sup>3</sup>, XiaoDong Liu<sup>4</sup>, ShuMei Ma<sup>4\*</sup>, ZhangYi Qu<sup>1\*</sup>

**Affiliations:**

**YuXue Zhang**, MSc. and **ZhangYi Qu**, Ph.D., <sup>1</sup>Department of Hygiene Microbiology, School of Public Health, Harbin Medical University, 157 Baojian Road, Harbin 150081, Heilongjiang Province, China; **YuPeng Liu**, MD., <sup>2</sup>Department of Epidemiology and Biostatistics, School of Public Health and Management, Wenzhou Medical University, 112 Nanliu Road, ChaShan High Education Zone, Wenzhou 325000, Zhejiang Province, China; **SuSheng Miao**, M.D. and Deputy Chief Surgeon, <sup>3</sup>Department of Head and Neck Surgery, Harbin Medical University Cancer Hospital, 150 Haping Road, Harbin 150081, Heilongjiang Province, China; **XiaoDong Liu**, MD. and **ShuMei Ma**, M.D., <sup>4</sup>Department of Occupational and Environmental Health, School of Public Health and Management, Wenzhou Medical University, 112 Nanliu Road, ChaShan High Education Zone, Wenzhou 325000, Zhejiang Province, China.

**Correspondence to:**

Professor **ZhangYi Qu**, Ph.D., Department of Hygiene Microbiology, School of Public Health, Harbin Medical University, 157 Baojian Road, Harbin 150081, Heilongjiang Province, China. Tel: +86-(0)451-87502881; Fax: +86-(0)451-87502885; E-mail: quzy\_hmu@163.com.

Professor **ShuMei Ma**, M.D., Department of Occupational and Environmental Health, School of Public Health and Management, Wenzhou Medical University, 112 Nanliu Road, ChaShan High Education Zone, Wenzhou 325000, Zhejiang Province, China. Tel/Fax: +86-(0)577-86699182; E-mail: shmm2001@126.com.

#These two authors contributed equally to this work.

**Author e-mail:** **YuXue Zhang**, zhang\_yuxue@126.com; **YuPeng Liu**, liuyupeng@wmu.edu.cn; **SuSheng Miao**, drmiaosusheng@126.com; **XiaoDong Liu**, liuxd2014@126.com; **ShuMei Ma**, shmm2001@126.com; **ZhangYi Qu**, quzy\_hmu@163.com.

### Strengths and limitations of this study

- This will be the most comprehensive and up-to-date systematic review to synthesise the evidence on the health effects of exposure to any types of persistent organic pollutants on the incidence risk of thyroid cancer.
- We will use rigorous statistical methods to summarise all the currently eligible data from epidemiological studies, perform extensive sensitivity meta-analyses to evaluate the robustness of our findings.
- The main possible limitations of this study are a limited number of eligible studies and possibly significant heterogeneity between studies.
- Another potential limitation is that it may be difficult to evaluate publication bias if there are not sufficient studies included.

1  
2  
3  
4  
5  
6  
7  
8  
9  
10  
11  
12  
13  
14  
15  
16  
17  
18  
19  
20  
21  
22  
23  
24  
25  
26  
27  
28  
29  
30  
31  
32  
33  
34  
35  
36  
37  
38  
39  
40  
41  
42  
43  
44  
45  
46  
47  
48  
49  
50  
51  
52  
53  
54  
55  
56  
57  
58  
59  
60

1 **ABSTRACT:**

2 **Introduction:** The thyroid cancer incidence has been increasing all over the world. However, the  
3 aetiology of thyroid cancer remains unclear. A growing body of evidence suggested exposure to  
4 persistent organic pollutants (POPs) may play a role in the initiation of thyroid cancer, but the results  
5 are generally inconsistent across studies. This review aims to synthesise the evidence for the health  
6 effects of POPs on the risk of thyroid cancer.

7 **Methods and analysis:** This protocol was reported in accordance to the Preferred Reporting Items for  
8 Systematic Review and Meta-Analysis Protocols (PRISMA-P) statements. A comprehensive search,  
9 including electronic database search (e.g. PubMed, Embase, ProQuest, and CNKI), website search,  
10 and manual search, will be performed to identify all eligible studies. The Population, Exposure,  
11 Comparator and Outcome (PECO) framework was used to clarify the inclusion and exclusion criteria.  
12 The Newcastle-Ottawa Scale (NOS) will be used to assess the quality of included studies. Maximally  
13 adjusted effect estimates from individual studies will be summarized with random-effect models in a  
14 conservative manner.  $I^2$  statistics and Q-tests will be used to test the heterogeneity across studies. We  
15 will perform extensive sensitivity analyses, such as confounding risk ratio (confounding RR), E-value,  
16 fixed-effect models, excluding the most relatively weighted study, including only the high-quality  
17 studies, and many predesigned subgroup analyses, etc. The findings will be reported in accordance to  
18 the PRISMA guidelines.

19 **Ethics and dissemination:** Ethical approval is not required in this systematic review of published  
20 literatures. The results will be published in a peer-reviewed journal and presented at relevant  
21 conferences.

22 **PROSPERO registration number:** CRD42020181343

## 1. INTRODUCTION

In the last decades, thyroid cancer was the most rapidly increasing cancer worldwide.<sup>1 2</sup> In 2020, there were 448,915 new cases in women worldwide, representing the fifth-most common cancer in women, compared with 137,287 new cases in men, representing the 16th-most common cancer in men.<sup>1 3</sup> In the United States, age-adjusted thyroid cancer incidence rate have increased approximately 4-fold from 4.8 cases/100,000 in 1975 to 17.4/100,000 in 2020 such that thyroid cancer incidence has been increased at an annual growth rate of about 3%.<sup>3 4</sup> This significant increase pattern was not only unique to the United States but also to a lot of other countries. The growth rate in China was even higher than that in the United States.<sup>5</sup> In China, the estimated incident cases of thyroid cancer reached 221,093 in 2020, accounting for about 38% of all annually diagnosed thyroid cancer cases.<sup>3</sup>

Although much of the increasing incidence of thyroid cancer is attributed to the improved detection and screening methods, this is unlikely to be the sole cause, since incidence rates are also obviously increasing among children, adolescents and young adults, or for more easily detectable cases with larger tumours.<sup>6 7</sup> Therefore, it is urgent to elucidate the aetiology of thyroid cancer. There are only a few well-established risk factors for thyroid cancer: gender, hereditary conditions, and ionizing radiation exposure (particularly when this exposure occurs during childhood).<sup>1 2</sup> However, the aetiology remains poorly understood. Recently, a growing body of evidence suggested exposure to persistent organic pollutants (POPs) may play a role in the initiation and development of thyroid cancer, but the results are not conclusive and generally inconsistent across studies.

POPs are a broad class of organic chemicals of global concern, which persist in the environment, bio-magnify and bio-accumulate through the food chain, can be transported all over the world.<sup>8</sup> There are three types of POPs most commonly encountered in the environment: 1) organochlorine pesticides (OCPs), such as dichlorodiphenyltrichloroethane (DDT) and its metabolites; 2) industrial chemicals, such as polychlorinated biphenyls (PCBs) and flame retardants (FRs) including polybrominated diphenyl ethers (PBDEs), brominated FRs (BFRs) and organophosphate FRs (PFRs); and 3) unintentional by-products of industrial processes such as polychlorinated dibenzo-p-dioxins (PCDDs) and polychlorinated dibenzofurans (PCDFs).<sup>9-11</sup>



1  
2  
3  
4 50 In our daily lives, POPs can be virtually detected in many products everywhere. Humans are exposed  
5  
6 51 to POPs in various ways: mainly through diet, but also through the air and the skin absorption.<sup>12 13</sup> For  
7  
8 52 the general population, the most common exposure route is dietary intake of contaminated fatty foods.  
9  
10 53 Due to the bioaccumulation and biomagnification through the food chain, the highest concentrations of  
11  
12 54 POPs can be found in the human body, as the top of the food chain.<sup>13</sup>

13  
14 55 A lot of evidence supports for their significant adverse effects on human health and the environment.  
15  
16 56 Human exposure to these chemicals, even to low levels of POPs can result in many negative health  
17  
18 57 effects including elevated cancer risk, endocrine disruption, immune function impairment, and  
19  
20 58 reproductive disorders.<sup>13 14</sup> Recently, several epidemiological studies have shown that POP exposure  
21  
22 59 has potential carcinogenesis properties in thyroid cancer.<sup>15-18</sup> However, the findings have been  
23  
24 60 inconsistent. There is only one previous meta-analysis by Han et al. in 2019, which actually focused  
25  
26 61 on the association of pesticides and thyroid cancer risk, but not for all types of POPs.<sup>19</sup>

## 29 62 **2. OBJECTIVES**

30  
31  
32 63 We therefore propose to conduct this systematic review and meta-analysis of epidemiological studies  
33  
34 64 to comprehensively summarize the evidence for the effects of exposure to any types of POPs on the  
35  
36 65 incidence risk of thyroid cancer in adult populations. The primary aims of this proposed study are to  
37  
38 66 determine if there is an association between exposure to any types of POPs and the incidence risk of  
39  
40 67 thyroid cancer; and to determine which subtypes of POPs exposure are associated with the thyroid  
41  
42 68 cancer risk. The secondary aim will be to determine which individual POP chemicals are associated  
43  
44 69 with the thyroid cancer risk.

## 45 46 47 70 **3. METHODS AND ANALYSIS**

48  
49  
50 71 This study has been registered in PROSPERO (CRD42020181343) on 2 may 2020.<sup>20</sup> We will  
51  
52 72 complete the study by 30 December 2021. The present protocol is in accordance to the PRISMA  
53  
54 73 protocols guidelines (PRISMA-P).<sup>21</sup> This is an original research protocol. Any changes or  
55  
56 74 modifications of the methods stated in this protocol will be updated via PROSPERO and reported in  
57  
58 75 the final systematic review itself. We will report the study according to the PRISMA guidelines  
59  
60 76 (PRISMA).<sup>22</sup>

### 77 **3.1. Eligibility criteria**

78 The Population, Exposure, Comparator and Outcome (PECO) framework was used to clarify the  
79 eligibility criteria.<sup>23</sup>

#### 80 *3.1.1. Types of populations*

81 We included studies of adult populations ( $\geq 18$  years old), while studies of children ( $< 18$  years) were  
82 excluded. Studies that detected and provided exposure levels of individual POPs or any subtype of  
83 POPs in biological samples were included, while studies that used only occupations to estimate the  
84 occupational exposure to POPs were excluded.

#### 85 *3.1.2. Types of exposures*

86 We will include studies of exposure to any types of POPs in accordance with the Stockholm  
87 Convention definition.<sup>8</sup> The exposure level to POPs could be detected directly with quantitative  
88 measurement in biological samples, including blood, urine, thyroid tissues, or adipose tissues.

#### 89 *3.1.3. Types of comparators*

90 The included comparator will be participants with the lowest exposure level of POPs in individual  
91 studies. We will include all these comparisons of the higher exposure levels versus the lowest level of  
92 POPs exposure. When the highest exposure level was used as the comparator in original studies, we  
93 will use the reciprocal method ( $1/x$ ) to convert the effect estimates of the lowest versus the highest  
94 level. We will exclude all other types of comparators.

#### 95 *3.1.4. Types of outcomes*

96 We will include studies that define and classify thyroid cancers using the relevant diagnostic codes in  
97 ICD-10 or other versions of the ICD. If studies do not reported the ICD codes but they provide the  
98 information on the cancer site, we will also include these studies. All patients should be diagnosed  
99 with clinical-pathological confirmation. The following measurements of thyroid cancer cases should

1  
2  
3  
4 100 be determined as eligible: 1) diagnosis by a physician; 2) medical records; 3) health insurance data;  
5 101 and 4) cancer registry data for diagnosis.  
6  
7

8 102 We will exclude all other measurements, including self-reported records without pathological  
9 103 diagnosis. Studies focusing on benign thyroid diseases (including thyroid enlargement and thyroid  
10 104 nodules, etc.) but not thyroid cancer will be excluded from this systematic review.  
11  
12  
13  
14

### 15 105 *3.1.5. Types of studies*

16  
17  
18 106 We will include a broad set of epidemiological studies that investigate the effect of exposure to POPs  
19 107 and thyroid cancer risk over any period. Eligible study designs will be cohort studies (both prospective  
20 108 and retrospective cohorts), case-cohort studies, case-control studies (including nested case-control  
21 109 studies, population- or hospital-based case-control studies). Due to rigorous ethical principles, there is  
22 110 no eligible randomized controlled trial or non-randomized intervention study in the preliminary  
23 111 search. We will exclude all other study designs (e.g. non-original studies, cross-sectional studies, case  
24 112 reports, case series, animal model researches, cell line researches, and other mechanism researches).  
25  
26  
27  
28  
29  
30  
31  
32

### 33 113 *3.1.6. Types of effect measures*

34  
35  
36 114 We will include the effect measures of exposure to any individual POPs or any combined subtype of  
37 115 POPs on the risk of developing thyroid cancer, compared with the lowest exposure level in each  
38 116 original research. All relative effect estimates, namely relative risk ratios (RR), odds ratios (OR), and  
39 117 hazard ratios (HR) are included.  
40  
41  
42  
43  
44

45 118 If an original study reports effect estimates from two or more alternative models that have been  
46 119 unadjusted or adjusted for different confounders, then we will systematically prioritize the maximally  
47 120 adjusted estimates from models adjusted for more covariates over those from models adjusted for  
48 121 fewer. For example, if a study presents effect estimates from a crude unadjusted model (Model A), a  
49 122 model adjusted for gender (Model B), and a model adjusted for gender, age, and BMI (Model C), we  
50 123 will then prioritize the estimate from Model C.  
51  
52  
53  
54  
55  
56  
57

## 58 124 ***3.2. Information sources and search***

### 125 *3.2.1. Electronic bibliographic databases*

126 The following databases will be searched from the database inception to May 29, 2020: PubMed,  
127 Embase, ProQuest, and CNKI, with no language restrictions. We will use a combination of Medical  
128 Subject Headings (MeSH) terms and corresponding free-text terms to search relevant literatures. The  
129 full details of search strategy are presented in **online supplementary file 1**.

### 130 *3.2.2. Other electronic database and website search*

131 We will search two additional grey literature databases for potentially eligible studies:

- 132 • Grey Literature Report (<http://greylit.org/>).
- 133 • OpenGrey (<http://www.opengrey.eu/>).

134 We will also search the websites of two international organizations for eligible datasets:

- 135 • World Health Organization ([www.who.int](http://www.who.int)).
- 136 • International Agency for Research on Cancer (<https://www.iarc.fr/>).

### 137 *3.2.4. Hand-searching and expert consultation*

138 We (YXZ, YPL and SSM) will hand-search for potentially eligible studies in:

- 139 • Reference list of all original researches, relevant reviews, editorials, and letters.
- 140 • Study records that have cited the included studies (identified in Web of Science citation database).

## 141 **3.3. Study selection**

142 All literature records identified in the search will be imported into the Covidence software<sup>24</sup> and  
143 duplicates will be identified and deleted. Afterwards, two authors (YXZ and YPL) will independently  
144 screen titles and abstracts, and then read full-texts of potentially relevant literatures. Authors will  
145 record specific reasons for exclusion in the full-text screening. A third author (SSM) will resolve any  
146 discrepancies. The process of study selection will be reported as per PRISMA guidelines.

## 147 **3.4. Data extraction and data items**

1  
2  
3  
4 148 Two authors (YXZ and YPL) will independently extract data, and a third author (SSM) will resolve  
5  
6 149 conflicts. The extracted data items will include study characteristics (including authors, publication  
7  
8 150 year, study country, participants age, gender, year of sample collection, and outcome), exposure  
9  
10 151 (including types of POPs, detection methods, comparator ), study design (including summary of study  
11  
12 152 design, statistical analysis models used and effect estimates), risk of bias (including selection bias,  
13  
14 153 reporting bias, confounding bias). Extracted data will also include information on the subtype of  
15  
16 154 thyroid cancer and pathophysiological characteristics of the subjects, if available. We will use the  
17  
18 155 predesigned standard sheet to extract data (see **online supplementary file 2**). This data extraction  
19  
20 156 sheet will be trialled until the authors reach convergence and agreement. Data will be entered into and  
21  
22 157 managed with the Microsoft Excel software. To request missing information, the corresponding author  
23  
24 158 will be contacted by emails (maximum of three emails over four weeks).

### 25 26 159 ***3.5. Risk of bias in individual studies***

27  
28  
29 160 Two authors (YXZ and YPL) will independently judge the quality and risk of bias for each study with  
30  
31 161 the Newcastle-Ottawa Scale (NOS).<sup>25</sup> Any discrepancies will be resolved by discussion or consultation  
32  
33 162 with a third author (XDL). All quality assessors will jointly trial the NOS criteria until they have  
34  
35 163 synchronized their understanding and application of the NOS scale. The NOS scale consists of three  
36  
37 164 domains of bias: selection (4 points), comparability (2 points), and outcome (3 points). According to  
38  
39 165 the sum points of three domains, individual studies will be categorized as either high ( $\geq 6$ ) or low ( $< 6$ )  
40  
41 166 quality. We will report the study-level risk of bias assessments by domains in a summary table (**online  
42  
43 167 supplementary file 3**).

### 44 45 46 168 ***3.6. Synthesis of results***

#### 47 48 49 169 ***3.6.1. Quantitative synthesis***

50  
51  
52 170 In the primary meta-analysis, we will use the maximally adjusted effect estimates and corresponding  
53  
54 171 95% confidence intervals (CI) to summarize the effect of POPs exposure on the risk of thyroid cancer.  
55  
56 172 To be more rigorous and conservative, we will use random-effect models rather than fixed-effect  
57  
58 173 models to summarize the effect sizes. In the primary meta-analysis, we will assess the overall effect of  
59  
60

174 exposure to all types of POPs and each subtype of POPs on the thyroid cancer risk. We will also assess  
175 the effect of exposure to any individual POPs, if the number of eligible studies is no less than three.

176 When two or more studies from the same cohort or data source are eligible for inclusion in the  
177 meta-analysis, we will prioritize in this order: 1) the study with the highest quality score and the  
178 lowest risk of bias; 2) the study with the most informative measurements of exposure to POPs; 3) the  
179 study with large sample size; 4) the study with the longest follow-up; 5) the study with the maximum  
180 adjustment for relevant potential confounding factors.

181 When studies only report effect sizes for each individual POP separately, we will initially combine  
182 these individual effects into a study-specific overall effect of total or subtype of POPs with  
183 fixed-effect models. When studies only report separately effect sizes on each individual type of  
184 thyroid cancer, we will also combine these effects into a study-specific overall effect for all types of  
185 thyroid cancer with fixed-effect models.

186 Comprehensive Meta Analysis version 2.2.046 (Biostat, Englewood, NJ, USA) will be used for all  
187 analyses. Statistical significance was defined as two-sided P-values less than 0.05 in the major  
188 meta-analysis. In all subgroup analyses, we will use the Bonferroni method to correct the level of  
189 statistical significance.

### 190 3.6.2. Heterogeneity inspection

191 We will calculate the  $I^2$  statistic and perform the Cochran Q-test to test the heterogeneity across  
192 studies and will report  $I^2$  statistics and P-values in the systematic review. Based on the  $I^2$  statistics, an  
193  $I^2$  value of  $\leq 30\%$  represents low heterogeneity, 30-50% moderate heterogeneity, 50-75% substantial  
194 heterogeneity, and  $>75\%$  considerable heterogeneity. If there is substantial between-study  
195 heterogeneity, we will perform meta-regression and subgroup analyses to explore potential sources of  
196 the heterogeneity. Meta-regression analyses will be performed according to sample size, year of blood  
197 sample collection or study publication. Subgroup analyses are elaborated in the section of 3.6.4.  
198 Sensitivity analysis.

### 199 3.6.3. Publication bias

1  
2  
3  
4 200 To assess potential publication bias, we will conduct the Begg's and Egger's tests and further  
5  
6 201 rigorously adjust for the summarized results by applying the Duval and Tweedie's trim and fill  
7  
8 202 method. We will also use funnel plots to ascertain presence of publication bias, if ten or more eligible  
9  
10 203 studies (datasets or comparisons) are included in our systematic review.

#### 11 12 204 *3.6.4. Sensitivity analysis*

13  
14  
15 205 We will perform a broad set of predesigned sensitivity analyses to evaluate the robustness of the  
16  
17 206 findings, as follows:

- 18  
19 207 • We will conduct a sensitivity analysis using fixed-effect models.
- 20  
21 208 • The minimally adjusted effect estimates will be pooled and these results will be compared with the  
22  
23 209 primary results from the maximally adjusted effects using the Confounding RR method, which is  
24  
25 210 defined as the ratio of pooled results of the maximally adjusted versus minimally adjusted data.<sup>26</sup>  
26  
27 211 Confounding RRs are used to evaluate whether the underlying confounders controlled in each  
28  
29 212 individual studies could have influenced the results.
- 30  
31 213 • To assess the potential impact of residual confounding bias, we will perform E-value analysis.<sup>27</sup>  
32  
33 214 E-value shows the minimum strength of association that a hypothetical residual confounding factor  
34  
35 215 would need to have with both the exposure to POPs and the incidence risk of thyroid cancer to fully  
36  
37 216 explain the observed effect.
- 38  
39 217 • A sensitivity analysis by removing the most relatively weighted study (or dataset) will be performed  
40  
41 218 to assess its influence on the results and to explore potential sources of heterogeneity across studies.
- 42  
43 219 • A sensitivity analysis including only the high-quality studies will be performed.
- 44  
45 220 • We will also perform a sensitivity analysis by including only the prospective studies (including  
46  
47 221 cohort studies, case-cohort studies, and nested case-control studies), because the prospective nature of  
48  
49 222 these study designs is invaluable for confirming the temporal sequence of POPs exposure and thyroid  
50  
51 223 cancer onset and therefore helps to examine causal associations.
- 52  
53 224 • We will performed predefined subgroup meta-analyses by geographic regions (as per WHO  
54  
55 225 Regions or World Bank Income Country Groups), sample size ( $\geq$ median vs.  $<$ median), year of blood  
56  
57 226 sample collection (before vs. after 2010), gender (female vs. male), and age of participants ( $<$ 50 vs.  
58  
59 227  $\geq$ 50 years), if eligible studies in each subgroup are no less than three. If else, these afore-mentioned  
60

228 subgroup analyses will be performed as sensitivity analyses by excluding the subgroup with less than  
229 three studies.

230 • We will also perform cumulative meta-analyses according to sample size of each individual study  
231 from small to large, year of blood drawing or study publication in chronological order from front to  
232 latest.

233 We will also perform some post hoc subgroup analyses or other additional analyses, whenever  
234 feasible.

### 235 **3.7. Quality of evidence assessment**

236 All authors will together assess quality of evidence for the entire body of evidence by exposures (total  
237 POPs or subtypes of POPs). We will use the GRADE approach to grade the quality of evidence as  
238 “high”, “moderate”, “low”, or “very low”.<sup>28</sup> The GRADEproGDT software online version will be used  
239 to summarize the quality of evidence.

240 We will downgrade or upgrade the quality of evidence according to the following domains: 1) study  
241 design; 2) risk of bias; 3) inconsistency; 4) indirectness; 5) imprecision; 6) publication bias; and 7)  
242 confounding bias. Within each domain, we will categorize the concern for the quality of evidence as  
243 “none”, “serious” and “very serious”. In the meta-analysis, if the prospective epidemiological studies  
244 (including cohort, case-cohort, and nested case-control studies) accounted for more than 60% of all  
245 included studies, we will start at “high” for the quality of evidence; or else, we will start at  
246 “moderate”. Afterwards, we will downgrade the quality of evidence for no concern by nil grades (0),  
247 for a serious concern by one grade (-1), or for a very serious concern by two grades (-2). We will  
248 upgrade the quality by one grade for each of the following reasons: large effect size (+1), a significant  
249 dose-response relationship (+1), or plausibility that residual confounders cannot explain the observed  
250 effect (+1).

251 For example, we start at “moderate” for a body of evidence consisting of 10 studies (including 5  
252 cohorts and 5 case-control studies). If there is a serious concern for both risk of bias (-1) and  
253 inconsistency (-1), meanwhile the summarized effect size is large (+1); but there is no other concerns



1  
2  
3  
4 254 and no other upgrading reasons, then we will downgrade the quality by one grade from “moderate” to  
5 255 “low”.

### 6 7 8 256 **3.8. Patient and public involvement**

9  
10  
11 257 Patients and the public were not involved in the design, conduct, or reporting of our present study.

12  
13  
14  
15 258 **Ethics and Dissemination:** Ethical approval is not required in this systematic review of published  
16 259 literatures. The results will be published in a peer-reviewed journal and presented at relevant  
17  
18 260 conferences to promote knowledge transfer.

19  
20  
21  
22 261 **Availability of data and materials:** Data collected through this systematic review will be managed  
23 262 by the present Research Group. The datasets used and/or analyses during the study will be presented  
24  
25 263 within the manuscript or as supplementary materials. We promise that all the datasets analysed in this  
26  
27 264 study will be publicly available for the general readers and researchers.

28  
29  
30  
31 265 **Author Contributions:** YXZ, YPL, ZYQ and SMM conceived and designed this systematic review.  
32  
33 266 All authors developed the selection criteria, risk bias assessment strategy, and data extraction criteria.  
34  
35 267 YXZ, YPL and SSM developed the pilot search strategy. YXZ and YPL will be the two title, abstract,  
36  
37 268 and full-text reviewers. SSM or XDL will be the third reviewer that will help resolve any discrepancy.  
38  
39 269 YXZ and YPL wrote the initial draft of the protocol. All authors revised the manuscript critically for  
40  
41 270 important intellectual content. All authors approved the final version of the systematic review to be  
42  
43 271 published: All authors. ZYQ and SMM are the guarantor of the systematic review.

44  
45  
46 272 **Funding statement:** This work was supported by the Natural Science Foundation of Heilongjiang  
47  
48 273 Province (YQ2019H021 to YPL); the China Postdoctoral Science Foundation (2018M641875 to  
49  
50 274 YPL); the Basic Medical and Health Science Project of Wenzhou Science and Technology Bureau  
51  
52 275 (Y20190191 to YPL). The funders and sponsors had no role in the design and conduct of the study;  
53  
54 276 collection, management, analysis, and interpretation of the data; preparation, review, or approval of  
55  
56 277 the manuscript; and decision to submit the manuscript for publication.

1  
2  
3  
4  
5  
6  
7  
8  
9  
10  
11  
12  
13  
14  
15  
16  
17  
18  
19  
20  
21  
22  
23  
24  
25  
26  
27  
28  
29  
30  
31  
32  
33  
34  
35  
36  
37  
38  
39  
40  
41  
42  
43  
44  
45  
46  
47  
48  
49  
50  
51  
52  
53  
54  
55  
56  
57  
58  
59  
60

278 **Conflict of Interest:** The authors declare that they have no competing financial interests or personal  
279 relationships that could have appeared to influence the writing and the publication of this work.

For peer review only

## REFERENCES

1. Bray F, Ferlay J, Soerjomataram I, et al. Global cancer statistics 2018: GLOBOCAN estimates of incidence and mortality worldwide for 36 cancers in 185 countries. *CA Cancer J Clin* 2018;68(6):394-424.
2. American Cancer Society. Thyroid Cancer. Available at: <https://www.cancer.org/cancer/thyroid-cancer.html>. (Accessed November 22, 2020).
3. Ferlay J, Ervik M, Lam F, et al. Global Cancer Observatory: Cancer Today. Lyon, France: International Agency for Research on Cancer. Available at: <https://gco.iarc.fr/today/home>. (Accessed November 22, 2020).
4. Lim H, Devesa SS, Sosa JA, et al. Trends in Thyroid Cancer Incidence and Mortality in the United States, 1974-2013. *JAMA* 2017;317(13):1338-48.
5. Frank W, Dillwyn W. Thyroid cancer. In: Stewart BW and Wild CP, eds. World Cancer Report 2014. Lyon, France, International Agency for Research on Cancer, WHO Press; 2014:738-750. .
6. Qian ZJ, Jin MC, Meister KD, et al. Pediatric Thyroid Cancer Incidence and Mortality Trends in the United States, 1973-2013. *JAMA Otolaryngol Head Neck Surg* 2019;145(7):617-23.
7. Bernier MO, Withrow DR, Berrington de Gonzalez A, et al. Trends in pediatric thyroid cancer incidence in the United States, 1998-2013. *Cancer* 2019;125(14):2497-505.
8. Stockholm Convention. The POPs. Available at: <http://www.pops.int/TheConvention/ThePOPs/tabid/673/Default.aspx>. (Accessed November 22, 2020).
9. European Commission Environment Chemicals. Persistent Organic Pollutants (POPs). Available at: [https://ec.europa.eu/environment/chemicals/international\\_conventions/index\\_en.htm](https://ec.europa.eu/environment/chemicals/international_conventions/index_en.htm). (Accessed November 22, 2020).
10. Guo W, Pan B, Sakkiah S, et al. Persistent Organic Pollutants in Food: Contamination Sources, Health Effects and Detection Methods. *Int J Environ Res Public Health* 2019;16(22)
11. United States Environmental Protection Agency. International Cooperation. Persistent Organic Pollutants: A Global Issue, A Global Response. Available at: <https://www.epa.gov/international-cooperation/persistent-organic-pollutants-global-issue-global-response#pops>. (Accessed December 02, 2020).
12. Abdallah MA, Pawar G, Harrad S. Evaluation of in vitro vs. in vivo methods for assessment of dermal absorption of organic flame retardants: a review. *Environ Int* 2015;74:13-22.
13. World Health Organization. Food safety: Persistent organic pollutants (POPs). Available at: [https://www.who.int/news-room/q-a-detail/food-safety-persistent-organic-pollutants-\(pops\)](https://www.who.int/news-room/q-a-detail/food-safety-persistent-organic-pollutants-(pops)). (Accessed November 22, 2020).
14. Ashraf MA. Persistent organic pollutants (POPs): a global issue, a global challenge. *Environ Sci Pollut Res Int* 2017;24(5):4223-27.
15. Zhang Q, Hu M, Wu H, et al. Plasma polybrominated diphenyl ethers, urinary heavy metals and the risk of thyroid cancer: A case-control study in China. *Environ Pollut* 2020:116162.

16. Huang H, Sjodin A, Chen Y, et al. Polybrominated Diphenyl Ethers, Polybrominated Biphenyls, and Risk of Papillary Thyroid Cancer: A Nested Case-Control Study. *Am J Epidemiol* 2020;189(2):120-32.
17. Han X, Meng L, Li Y, et al. Associations between Exposure to Persistent Organic Pollutants and Thyroid Function in a Case-Control Study of East China. *Environ Sci Technol* 2019;53(16):9866-75.
18. Deziel NC, Warren JL, Huang H, et al. Exposure to polychlorinated biphenyls and organochlorine pesticides and thyroid cancer in connecticut women. *Environ Res* 2021;192:110333.
19. Han MA, Kim JH, Song HS. Persistent organic pollutants, pesticides, and the risk of thyroid cancer: systematic review and meta-analysis. *Eur J Cancer Prev* 2019;28(4):344-49.
20. Liu Y, Zhang Y, Qu Z, et al. Associations between exposure to persistent organic pollutants and the risk of thyroid cancer: A systematic review and meta-analysis. PROSPERO 2020 CRD42020181343. Available from: [https://www.crd.york.ac.uk/prospero/display\\_record.php?ID=CRD42020181343](https://www.crd.york.ac.uk/prospero/display_record.php?ID=CRD42020181343).
21. Shamseer L, Moher D, Clarke M, et al. Preferred reporting items for systematic review and meta-analysis protocols (PRISMA-P) 2015: elaboration and explanation. *BMJ* 2015;350:g7647.
22. Liberati A, Altman DG, Tetzlaff J, et al. The PRISMA statement for reporting systematic reviews and meta-analyses of studies that evaluate healthcare interventions: explanation and elaboration. *BMJ* 2009;339:b2700.
23. Morgan RL, Whaley P, Thayer KA, et al. Identifying the PECO: A framework for formulating good questions to explore the association of environmental and other exposures with health outcomes. *Environ Int* 2018;121(Pt 1):1027-31.
24. Covidence Community. Covidence, 2020. Available at: <https://community.cochrane.org/help/tools-and-software/covidence>. (Accessed Nov 25, 2020).
25. Wells GA, Shea B, O'Connell D, et al. The Newcastle -Ottawa Scale (NOS) for assessing the quality if nonrandomized studies in meta-analyses. Available at: [http://www.ohri.ca/programs/clinical\\_epidemiology/oxford.asp](http://www.ohri.ca/programs/clinical_epidemiology/oxford.asp). (Accessed December 16, 2020).
26. Greenland S, Pearce N. Statistical foundations for model-based adjustments. *Annu Rev Public Health* 2015;36:89-108.
27. VanderWeele TJ, Ding P. Sensitivity Analysis in Observational Research: Introducing the E-Value. *Ann Intern Med* 2017;167(4):268-74.
28. Guyatt GH, Oxman AD, Vist GE, et al. GRADE: an emerging consensus on rating quality of evidence and strength of recommendations. *BMJ* 2008;336(7650):924-6.

1  
2  
3  
4 **SUPPLEMENTARY FILES**  
5  
6  
7  
8  
9

10 **Exposure to persistent organic pollutants and thyroid cancer risk: a study protocol of systematic review**  
11 **and meta-analysis**  
12  
13  
14  
15  
16  
17

18 YuXue Zhang, YuPeng Liu, SuSheng Miao, XiaoDong Liu, ShuMei Ma, ZhangYi Qu  
19  
20  
21  
22  
23  
24  
25  
26  
27  
28  
29  
30  
31  
32  
33  
34  
35  
36  
37  
38  
39  
40  
41  
42  
43  
44  
45  
46  
47  
48  
49  
50  
51  
52  
53  
54  
55  
56  
57  
58  
59  
60

**Supplementary File 1.** Detailed Electronic Search strategy.**• PubMed:**

#1. "persistent organic pollutants"[MeSH Terms] OR "ddt"[MeSH Terms] OR "chlordan"[MeSH Terms] OR "aldrin"[MeSH Terms] OR "dieldrin"[MeSH Terms] OR "endrin"[MeSH Terms] OR "heptachlor"[MeSH Terms] OR "hexachlorobenzene"[MeSH Terms] OR "mirex"[MeSH Terms] OR "toxaphene"[MeSH Terms] OR "chlordecone"[MeSH Terms] OR "polychlorinated biphenyls"[MeSH Terms] OR "halogenated diphenyl ethers"[MeSH Terms] OR "dibenzofurans, polychlorinated"[MeSH Terms] OR "dioxins"[MeSH Terms] OR "dioxins and dioxin like compounds"[MeSH Terms] OR "polychlorinated dibenzodioxins"[MeSH Terms]

#2. "pentachlorobenzene"[Supplementary Concept] OR "decabromobiphenyl ether"[Supplementary Concept] OR "2 2 4 4 5 6 hexabromodiphenyl ether"[Supplementary Concept] OR "perfluorooctane sulfonic acid"[Supplementary Concept] OR "perfluorooctanoic acid"[Supplementary Concept]

#3. "persistent organic pollutants"[Title/Abstract] OR "persistent organic pollutant"[Title/Abstract] OR "POPs"[Title/Abstract] OR "organochlorine pesticides"[Title/Abstract] OR "OCPs"[Title/Abstract] OR "ddt"[Title/Abstract] OR "chlordan"[Title/Abstract] OR "aldrin"[Title/Abstract] OR "dieldrin"[Title/Abstract] OR "endrin"[Title/Abstract] OR "heptachlor"[Title/Abstract] OR "hexachlorobenzene"[Title/Abstract] OR "mirex"[Title/Abstract] OR "toxaphene"[Title/Abstract] OR "chlordecone"[Title/Abstract] OR "pentachlorobenzene"[Title/Abstract] OR "polychlorinated biphenyls"[Title/Abstract] OR "PCBs"[Title/Abstract] OR "polychlorinated naphthalenes"[Title/Abstract] OR "halogenated diphenyl ethers"[Title/Abstract] OR "polybrominated diphenyl ethers"[Title/Abstract] OR "PBDEs"[Title/Abstract] OR "c-decaBDE"[Title/Abstract] OR "dibenzofurans polychlorinated"[Title/Abstract] OR "dioxins"[Title/Abstract] OR "dioxins and dioxin like compounds"[Title/Abstract] OR "polychlorinated dibenzodioxins"[Title/Abstract] OR "decabromobiphenyl ether"[Title/Abstract] OR "2 2 4 4 5 6 hexabromodiphenyl ether"[Title/Abstract] OR "perfluorooctane sulfonic acid"[Title/Abstract] OR "perfluorooctanoic acid"[Title/Abstract] OR "PFOS"[Title/Abstract] OR "PFOA"[Title/Abstract]

#4. #1 OR #2 OR #3

#5. "thyroid neoplasms"[MeSH Terms]

#6. "thyroid neoplasm"[All Fields] OR "thyroid carcinomas"[All Fields] OR "thyroid carcinoma"[All Fields] OR "thyroid cancers"[All Fields] OR "thyroid cancer"[All Fields] OR "thyroid adenomas"[All Fields] OR "thyroid adenoma"[All Fields] OR "thyroid tumours"[All Fields] OR "thyroid tumour"[All Fields]

#7. #5 OR #6

#8. #4 AND #7

1  
2  
3  
4 • **Embase:**  
5

6  
7 #1. 'persistent organic pollutants':ti,ab,kw OR 'persistent organic pollutant':ti,ab,kw OR POPs:ti,ab,kw OR  
8 'organochlorine pesticides':ti,ab,kw OR OCPs:ti,ab,kw OR DDT:ti,ab,kw OR chlordan:ti,ab,kw OR  
9 aldrin:ti,ab,kw OR dieldrin:ti,ab,kw OR endrin:ti,ab,kw OR heptachlor:ti,ab,kw OR  
10 hexachlorobenzene:ti,ab,kw OR mirex:ti,ab,kw OR toxaphene:ti,ab,kw OR chlordecone:ti,ab,kw OR  
11 'pentachlorobenzene':ti,ab,kw OR 'polychlorinated biphenyls':ti,ab,kw OR PCBs:ti,ab,kw OR 'polychlorinated  
12 naphthalenes':ti,ab,kw OR 'halogenated diphenyl ethers':ti,ab,kw OR 'polybrominated diphenyl  
13 ethers':ti,ab,kw OR PBDEs:ti,ab,kw OR c-decaBDE:ti,ab,kw OR 'dibenzofurans polychlorinated':ti,ab,kw OR  
14 dioxins:ti,ab,kw OR 'dioxins and dioxin like compounds':ti,ab,kw OR 'polychlorinated  
15 dibenzodioxins':ti,ab,kw OR 'decabromobiphenyl ether':ti,ab,kw OR '2 2 4 4 5 6 hexabromodiphenyl  
16 ether':ti,ab,kw OR 'perfluorooctane sulfonic acid':ti,ab,kw OR 'perfluorooctanoic acid':ti,ab,kw OR  
17 PFOS:ti,ab,kw OR PFOA:ti,ab,kw  
18

19  
20 #2. 'thyroid neoplasms':ti,ab,kw OR 'thyroid neoplasm':ti,ab,kw OR 'thyroid carcinomas':ti,ab,kw OR 'thyroid  
21 carcinoma':ti,ab,kw OR 'thyroid cancers':ti,ab,kw OR 'thyroid cancer':ti,ab,kw OR 'thyroid adenomas':ti,ab,kw  
22 OR 'thyroid adenoma':ti,ab,kw OR 'thyroid tumours':ti,ab,kw OR 'thyroid tumour':ti,ab,kw  
23

24  
25 #3. #1 AND #2  
26  
27

28  
29  
30  
31  
32 • **ProQuest:**  
33

34  
35 #1. mesh(persistent organic pollutants) OR mesh(DDT) OR mesh(chlordan) OR mesh(aldrin) OR  
36 mesh(dieldrin) OR mesh(endrin) OR mesh(heptachlor) OR mesh(hexachlorobenzene) OR mesh(mirex) OR  
37 mesh(toxaphene) OR mesh(chlordecone) OR mesh(polychlorinated biphenyls) OR mesh(halogenated  
38 diphenyl ethers) OR mesh(dibenzofurans, polychlorinated) OR mesh(dioxins) OR mesh(dioxins and dioxin  
39 like compounds) OR mesh(polychlorinated dibenzodioxins) OR mesh(pentachlorobenzene) OR  
40 mesh(decabromobiphenyl ether) OR mesh(2 2 4 4 5 6 hexabromodiphenyl ether) OR mesh(perfluorooctane  
41 sulfonic acid) OR mesh(perfluorooctanoic acid)  
42

43  
44 #2. ab(persistent organic pollutants) OR ab(persistent organic pollutant) OR ab(POPs) OR ab(organochlorine  
45 pesticides) OR ab(OCPs) OR ab(DDT) OR ab(chlordan) OR ab(aldrin) OR ab(dieldrin) OR ab(endrin) OR  
46 ab(heptachlor) OR ab(hexachlorobenzene) OR ab(mirex) OR ab(toxaphene) OR ab(chlordecone) OR  
47 ab(pentachlorobenzene) OR ab(polychlorinated biphenyls) OR ab(PCBs) OR ab(polychlorinated naphthalenes)  
48 OR ab(halogenated diphenyl ethers) OR ab(polybrominated diphenyl ethers) OR ab(PBDEs) OR  
49 ab(c-decaBDE) OR ab(dibenzofurans polychlorinated) OR ab(dioxins) OR ab(dioxins and dioxin like  
50 compounds) OR ab(polychlorinated dibenzodioxins) OR ab(decabromobiphenyl ether) OR ab(2 2 4 4 5 6  
51 hexabromodiphenyl ether) OR ab(perfluorooctane sulfonic acid) OR ab(perfluorooctanoic acid) OR ab(PFOS)  
52 OR ab(PFOA)  
53  
54  
55  
56  
57  
58  
59  
60

1  
2  
3 #3. #1 OR #2  
4  
5

6 #4. mesh(thyroid neoplasms)  
7

8 #5. ab(thyroid neoplasm) OR ab(thyroid carcinomas) OR ab(thyroid carcinoma) OR ab(thyroid cancers) OR  
9 ab(thyroid cancer) OR ab(thyroid adenomas) OR ab(thyroid adenoma) OR ab(thyroid tumours) OR ab(thyroid  
10 tumour)  
11  
12

13  
14 #6. #4 OR #5  
15

16  
17 #7. #3 AND #6  
18

19 • CNKI:  
20

21  
22 #1. SU=持久性有机污染物 OR SU=POPs OR SU=有机氯杀虫剂 OR SU=DDT OR SU=氯丹 OR SU=艾  
23 氏剂 OR SU=狄氏剂 OR SU=异狄氏剂 OR SU=七氯 OR SU=六氯苯 OR SU=灭蚁灵 OR SU=毒杀芬  
24 OR SU=十氯酮 OR SU=五氯苯 OR SU=多氯联苯 OR SU=PCBs OR SU=多氯化萘 OR SU=卤代苯醚  
25 OR SU=多溴联苯醚 OR SU=PBDEs OR SU=呋喃 OR SU=二恶英 OR SU=多氯二苯并二恶英 OR SU=  
26 十溴二苯醚 OR SU=六溴二苯醚 OR SU=全氟辛烷磺酸 OR SU=全氟辛酸 OR SU=persistent organic  
27 pollutants OR SU=organochlorine pesticides OR SU=polychlorinated biphenyls OR SU=halogenated  
28 diphenyl ethers OR SU=polybrominated diphenyl ethers  
29  
30  
31  
32

33  
34 #2. KY=持久性有机污染物 OR KY=POPs OR KY=有机氯杀虫剂 OR KY=DDT OR KY=氯丹 OR KY=  
35 艾氏剂 OR KY=狄氏剂 OR KY=异狄氏剂 OR KY=七氯 OR KY=六氯苯 OR KY=灭蚁灵 OR KY=毒  
36 杀芬 OR KY=十氯酮 OR KY=五氯苯 OR KY=多氯联苯 OR KY=PCBs OR KY=多氯化萘 OR KY=卤  
37 代苯醚 OR KY=多溴联苯醚 OR KY=PBDEs OR KY=呋喃 OR KY=二恶英 OR KY=多氯二苯并二恶  
38 英 OR KY=十溴二苯醚 OR KY=六溴二苯醚 OR KY=全氟辛烷磺酸 OR KY=全氟辛酸 OR  
39 KY=persistent organic pollutants OR KY=organochlorine pesticides OR KY=polychlorinated biphenyls OR  
40 KY=halogenated diphenyl ethers OR KY=polybrominated diphenyl ethers  
41  
42  
43  
44

45 #3. #1 OR #2  
46

47  
48 #4. SU=甲状腺癌 OR SU=甲状腺肿瘤 OR SU=thyroid cancer OR SU=thyroid neoplasms  
49

50 #5. KY=甲状腺癌 OR KY=甲状腺肿瘤 OR KY= thyroid cancer OR KY= thyroid neoplasms  
51

52  
53 #6. #4 OR #5  
54

55  
56 #7. #3 AND #6  
57  
58  
59  
60



**Supplementary File 2.** Main Characteristics extracted from individual studies included in this study.

| Study   | Study characteristics          |              |                                     |                                | Population characteristics                                  |                   |             | Exposure characteristics                |                     |              | Outcomes characteristics |            |          |                 | Quality score (NOS) |                  |
|---------|--------------------------------|--------------|-------------------------------------|--------------------------------|-------------------------------------------------------------|-------------------|-------------|-----------------------------------------|---------------------|--------------|--------------------------|------------|----------|-----------------|---------------------|------------------|
|         | First author, Publication year | Study design | Study implementation period (year), | Sample collection time (year), | Mean/median duration of follow-up (months), only for cohort | Country or region | Sample size | Age Median (range)/Mean age (SD), years | Gender Female /Male | Type of POPs | Detection method         | Comparator | Outcomes | Analysis models |                     | Effect estimates |
| Study 1 |                                |              |                                     |                                |                                                             |                   |             |                                         |                     |              |                          |            |          |                 |                     |                  |
| Study 2 |                                |              |                                     |                                |                                                             |                   |             |                                         |                     |              |                          |            |          |                 |                     |                  |
| Study 3 |                                |              |                                     |                                |                                                             |                   |             |                                         |                     |              |                          |            |          |                 |                     |                  |
| Study 4 |                                |              |                                     |                                |                                                             |                   |             |                                         |                     |              |                          |            |          |                 |                     |                  |
| Study 5 |                                |              |                                     |                                |                                                             |                   |             |                                         |                     |              |                          |            |          |                 |                     |                  |
| Study 6 |                                |              |                                     |                                |                                                             |                   |             |                                         |                     |              |                          |            |          |                 |                     |                  |
| ...     |                                |              |                                     |                                |                                                             |                   |             |                                         |                     |              |                          |            |          |                 |                     |                  |

**Supplementary File 3.** Detailed quality scores of individual studies assessed with the Newcastle-Ottawa Quality Assessment Scale (NOS).

| Study   | Selection                        |                                 |                       |                        | Comparability                                |                                          | Exposure                  |                                                     |                   | Total Score |
|---------|----------------------------------|---------------------------------|-----------------------|------------------------|----------------------------------------------|------------------------------------------|---------------------------|-----------------------------------------------------|-------------------|-------------|
|         | Is the case definition adequate? | Representativeness of the cases | Selection of controls | Definition of controls | Study controls for the most important factor | Study controls for any additional factor | Ascertainment of exposure | Same method of ascertainment for cases and controls | Non-response rate |             |
| Study 1 | √                                | √                               | -                     | -                      | -                                            | √                                        | √                         | √                                                   | √                 | 6           |
| Study 2 | √                                | √                               | √                     |                        | √                                            | √                                        | √                         | √                                                   | √                 | 8           |
| Study 3 | √                                | √                               | √                     | √                      | √                                            | √                                        | √                         | √                                                   | √                 | 9           |
| Study 4 | √                                | √                               | √                     | √                      | -                                            | -                                        | √                         | √                                                   | √                 | 7           |
| Study 5 | √                                | √                               | √                     | √                      | √                                            | -                                        | √                         | √                                                   | √                 | 8           |
| Study 6 | √                                | -                               | √                     | √                      | -                                            | -                                        | √                         | -                                                   | -                 | 4           |
| ...     |                                  |                                 |                       |                        |                                              |                                          |                           |                                                     |                   |             |

**PRISMA-P 2015 checklist**

| Section and topic                 | Item No | Checklist item                                                                                                                                                                                                                | Page(s)                                  |
|-----------------------------------|---------|-------------------------------------------------------------------------------------------------------------------------------------------------------------------------------------------------------------------------------|------------------------------------------|
| <b>ADMINISTRATIVE INFORMATION</b> |         |                                                                                                                                                                                                                               |                                          |
| Title:                            |         |                                                                                                                                                                                                                               |                                          |
| Identification                    | 1a      | Identify the report as a protocol of a systematic review                                                                                                                                                                      | Title page                               |
| Update                            | 1b      | If the protocol is for an update of a previous systematic review, identify as such                                                                                                                                            | Not applicable                           |
| Registration                      | 2       | If registered, provide the name of the registry (such as PROSPERO) and registration number                                                                                                                                    | Page 2                                   |
| Authors:                          |         |                                                                                                                                                                                                                               |                                          |
| Contact                           | 3a      | Provide name, institutional affiliation, e-mail address of all protocol authors; provide physical mailing address of corresponding author                                                                                     | Title page                               |
| Contributions                     | 3b      | Describe contributions of protocol authors and identify the guarantor of the review                                                                                                                                           | Page 12                                  |
| Amendments                        | 4       | If the protocol represents an amendment of a previously completed or published protocol, identify as such and list changes; otherwise, state plan for documenting important protocol amendments                               | Not applicable                           |
| Support:                          |         |                                                                                                                                                                                                                               |                                          |
| Sources                           | 5a      | Indicate sources of financial or other support for the review                                                                                                                                                                 | Page 12                                  |
| Sponsor                           | 5b      | Provide name for the review funder and/or sponsor                                                                                                                                                                             | Page 12                                  |
| Role of sponsor or funder         | 5c      | Describe roles of funder(s), sponsor(s), and/or institution(s), if any, in developing the protocol                                                                                                                            | Page 12                                  |
| <b>INTRODUCTION</b>               |         |                                                                                                                                                                                                                               |                                          |
| Rationale                         | 6       | Describe the rationale for the review in the context of what is already known                                                                                                                                                 | Page 3-4                                 |
| Objectives                        | 7       | Provide an explicit statement of the question(s) the review will address with reference to participants, interventions, comparators, and outcomes (PICO)                                                                      | Page 4, 5                                |
| <b>METHODS</b>                    |         |                                                                                                                                                                                                                               |                                          |
| Eligibility criteria              | 8       | Specify the study characteristics (such as PICO, study design, setting, time frame) and report characteristics (such as years considered, language, publication status) to be used as criteria for eligibility for the review | Page 5-6                                 |
| Information sources               | 9       | Describe all intended information sources (such as electronic databases, contact with study authors, trial registers or other grey literature sources) with planned dates of coverage                                         | Page 7                                   |
| Search strategy                   | 10      | Present draft of search strategy to be used for at least one electronic database, including planned limits, such that it could be repeated                                                                                    | Page 7 and online supplementary file 1   |
| Study records:                    |         |                                                                                                                                                                                                                               |                                          |
| Data management                   | 11a     | Describe the mechanism(s) that will be used to manage records and data throughout the review                                                                                                                                  | Page 7                                   |
| Selection process                 | 11b     | State the process that will be used for selecting studies (such as two independent reviewers) through each phase of the review (that is, screening, eligibility and inclusion in meta-analysis)                               | Page 7                                   |
| Data collection process           | 11c     | Describe planned method of extracting data from reports (such as piloting forms, done independently, in duplicate), any processes for obtaining and confirming data from investigators                                        | Page 7 and online supplementary file 2   |
| Data items                        | 12      | List and define all variables for which data will be sought (such as PICO items, funding sources), any pre-planned data assumptions and simplifications                                                                       | Page 7-8 and online supplementary file 2 |
| Outcomes and prioritization       | 13      | List and define all outcomes for which data will be sought, including prioritization of main and additional outcomes, with rationale                                                                                          | Page 5-6                                 |

|                                    |     |                                                                                                                                                                                                                                                     |                |
|------------------------------------|-----|-----------------------------------------------------------------------------------------------------------------------------------------------------------------------------------------------------------------------------------------------------|----------------|
| Risk of bias in individual studies | 14  | Describe anticipated methods for assessing risk of bias of individual studies, including whether this will be done at the outcome or study level, or both; state how this information will be used in data synthesis                                | Page 8         |
| Data synthesis                     | 15a | Describe criteria under which study data will be quantitatively synthesised                                                                                                                                                                         | Page 8-9       |
|                                    | 15b | If data are appropriate for quantitative synthesis, describe planned summary measures, methods of handling data and methods of combining data from studies, including any planned exploration of consistency (such as I <sup>2</sup> , Kendall's τ) | Page 8-10      |
|                                    | 15c | Describe any proposed additional analyses (such as sensitivity or subgroup analyses, meta-regression)                                                                                                                                               | Page 10-11     |
|                                    | 15d | If quantitative synthesis is not appropriate, describe the type of summary planned                                                                                                                                                                  | Not applicable |
| Meta-bias(es)                      | 16  | Specify any planned assessment of meta-bias(es) (such as publication bias across studies, selective reporting within studies)                                                                                                                       | Page 9-11      |
| Confidence in cumulative evidence  | 17  | Describe how the strength of the body of evidence will be assessed (such as GRADE)                                                                                                                                                                  | Page 11        |

From: Shamseer L, Moher D, Clarke M, Ghersi D, Liberati A, Petticrew M, Shekelle P, Stewart L, PRISMA-P Group. Preferred reporting items for systematic review and meta-analysis protocols (PRISMA-P) 2015: elaboration and explanation. *BMJ*. 2015 Jan 2;349(jan02 1):g7647.

For peer review only
